# Supplementary material for: Meningitis Caused by the Live Varicella Vaccine Virus: Metagenomic Next Generation Sequencing, Immunology Exome Sequencing and Cytokine Multiplex Profiling
Source: MDPI journal article supplement (doi:10.3390/v13112286), 2021-11-16
Supplement: s1 [file s1]

Supplemental Figure S1. Additional data about mNGS reads.

CTCCACGTAGCAAAGCTACACTTTTGCATCAGCCTCCACTTCGTCTGTGGGGGCC  
GGCCCCACAGACGGAAGTGGAGGCTGATGCAAAAAGTGATGCTTTGCTACGTGGAG  
CATTAATGTATAAACCACGCCGCCAGCAATGTTTTATTTATATACAAAATAAAAACATACACCAGAAACGTTTTAGTTTTAT  
T  
AATAAAAACTAAAAACGTTTCTGGTGTATGTTTTATTTTGTATATAAAATTAACATTGCTGGCCGGCGTGGTTATTACATTTAATG  
CTAGACGCGGCCGATCCAGCCCCGTGTTGATCGTCTCGCCCATTTACGATCAACCGCACGTGTCTGTGAG  
CTCACAGCACACGTGCGGTTGATCGTATAATGGGCGAGAACGATACAACACGGGCTGGATCGGCCGCGTCTAG  
TTCCCGGAGACAAAAGATTACGGGTGAACCGGAACCTACAACCACCTAGTATACCTTAACCAACCGCCGTGTGGAAAGGTATATGTC  
AACATTACAGTAATATATTA  
TTTAATATATTACTGTAAATGTTGACATATACCTTTCACAACGGCGGTGAGTTAAGGTATACTAGGTGGTTGAGGTTCCGGTTACCCGA  
TAATCTTTTGTCTCGGGGAA  
CACACGGATCCTGTTCATTTCGGTAGAACCGGAGGGCGGTTAAATTGATATTC  
GAATATCAATTTAAACGCCCTCCCGGTTCTACCGAAATGACACAGGATCCGTGTG  
GATCACGCAAGTAATCCCACTAAACGCCCCACGTGAAGTAACCTGAAAACGATGAAGAAAACCAATAATGCATTTATTTT  
AAAATAAATGCATTATTTGGTTTTCTTCATCGTTTTTCAGTTACTTCACGTGGCGGTTTAGTTGGGATTACTTGCCTGATC  
GAAACAATTGCTGTTCTGTTGGCATCCGCTGCCTGTTTATCCGTATATCTTCTCGCCCGGCAT  
ATGCCGGGCAGAAAGATATACGGATAAACAGGCACGGATGCCAACAGAACAGCAATTGTTTC  
AACATACATTCTCCCGCGGACTGTAGACATGTTACCGTTGTGTTTCATAAACGTAAGTGGAAATGCGCCCGTCTTTACAATC  
GATTGTAAAGACGGGCGCATTTCCCGTACGTTATGAACACAACGGTAACATGCTACAGTCCGCGGGGAGAAATGTATGTT  
GGGATAATGGCGGTGGGCGAGGCTCCAAAAGGCAATTTGAGCGTTTTAAGTTTGGGGTACGTTTTTAAAGCTTGTATGGCAAACGTT  
ACCGCAATC  
GATTTGCGGTAACGTTTGCCAATCAAGCTTTAAAAACGTACCCCAAACTTAAACGCTCAAAATGCCTTTTGGAGGCGCTGCCCAACG  
GCCATTATCCC  
CCCGATATTGTATTGTAGTACAGGGCAATGGGAATTGATGATCCCAATAAACGGCATAGACGCACAGCGCCGTTATA  
TATAACGGCGCTGTGCGTCTATGCGGTTTATGGGATCATCAATCCCAATGCGCTGTACTACAATACAATATCGGG  
CCGATTTACCGTGTTTACGGCAGTCTGACCATTTACCAGTGTATGTCTGTAATACGACGTTGTTG  
CAACAACGTCGTATTACAGACATACACTGGTAAATGGTCAGACTGCCGTAAACACGGTAAATCGG  
GGATTACGAACCATAAATATCTGTCTGGTTTATAATCCTTATCTTGCATGTGTCCGTAT  
ATACGGACACATGCAAGATAAAGGATTATAAACCAAGACAGATAAATTATGGTTTCGTAATCC  
ATACATAATACAAATATCAGCGTGCTTGGGTTTCCAGTATTTATTCGTATCGCTACAACGTTAAATG  
CATTTAACGTTGTAGCGATACGAATAAATACTGGAAACCGCAAGCACCGTGATATTTGATATTATGTAT  
CCCTGTAAACGCCACCGCTCACAGCTTCTAGATAAAAAAGCAGTCGCGCCA  
TGGCGCGACTGCTTTTTTATCTAGAACGCTGTGACGCTGGTGCCTTTACAGGG  
TAAACTTCAAGTGTCCAGATGAGACAGCTAGGGTGGAGAAGTCATCTCCAAGTTGTTTTG  
CAAAAAACAACCTGGAGATGACTTCTCCACCCCTAGCTGTCTCATCTGGACACTTGAAGTTTA  
CTTCTGACGGCTATAGCGGTGAGAGTGAATAATCTATCGTACTAAGTCTCGACGAACATCGGTCATG  
CATGACCGATGTTCTGTGAGACTTAGTACGATAGAAATTTTACTCTCACTGCTATAGCCGTGAGAAG  
CTAGCGTTTAGTGTAAAAAGTGGCATAAACACCACCGTCTAGTCTTAAAAATATTTTGGCGCCCTCATG  
CATGAGGGCGCAAAAAATATTTTAAAGACTAGACGGTGGTGTATGCCACGTTTTACACTAAACGCTAG  
TAAATTGTGTGTTGCTCTGTCTATACGGCGCACGAGTGTGTCTAATATGCGACGAAACGTTGGAT  
ATCCAAAGTTTCTGCGCATATTAGACACACAGCGTGCCTGATAGAACAGACAAACACAATTTA  
GGAGAAAAAGCCAAAGAGTCTGTAGTTTGTTCGTCTTCATCTCTCTCGTGTGGG  
CCACGACGAGGAAGAGGATGAAGACGAACAACTCACGACTTTTGCTTTTTCTCC  
CGCGCCGCATGATATACCGCCCCCATGGCGTGTAGTCT  
AGACTACAGCCATGGGGGGCGGTATATCATGCCGGCGCG  
TGTAACCAAGTTTTTCGCAATATTGTTTCATCTGTAATAATATGTATCACAGCTTCCGTATATAAGCG  
CGCTTATATACGGAAGCTGTGATACATATTTTACAGATGAACATATTGCGAAAACTGGTTACA  
GCAGTACAGAAATAATACGCAATGAGTCTATACACCCCGAGGTACAGATTCCC  
GGCAATCTGACCTCGGGGTGTATAGACTCATTGCGTATTATTTCTGTACGTGC  
GGGCTGGATCGGCCGGTCTAGACTGTAAAGCTAATAGTTAACTTAAAAAACATGAGACATG  
CATGTCTCATGTTTTTTAAGTTAACTATTAGCTTTACAAGTCTAGACGCGCGCATCCAGCCC  
ATTAGAAACATTAGTTCGGTTCAAGAACTACTGAACTCCGAGATGGATCAGGACAGCAGTTCTGACGCATCGGATGATTTTCCGG  
G  
CCCCGAAAAATCATCCGATGCGTCAGAACTGCTGTCTGATCCATCTCGGAGTTCAGTAGTCTTGAACCGCAACTAATGTTTCTGAAT  
CATGGAACCGGATGGGTTGTGGCCAGTAACCGGATTCAGGCGCTTTTATTATCTAGCC  
GGCTAGATAATGAAGGCCCTGAATACCGGTTACTGGCCACAACCCATCCGTTTCCATG  
GTTTTTGGTGACGTGGCAGATGTGCTTGCACTCCGACATCCGACCGTATCTACTAACCCTGAAAGTGAAGTCCGCCATAAACCGCTGT  
ACAGCGTTTATGGCGGCTCACTTTCAGGGTTAGTAGATACGGTCCGATGTCCGATGCAAGCACATCTGCCACGTACCAAAAAAAC  
TACAGCAAGCCTTGTCTATTCTTCAGTGGGCTCGCGATTATGGATCCGGAACCGTGCCTCAATGCGAG  
CTGCAATTGGCACGGTTCCGGATCCATAATCGCGAGCCCACTGAAGAATAGACAAGGCTTGTGTA  
AAATAACGCCAACTCAACCGTTACGGCTGTAAGTTCTGCGTGTTTTTCATGTTGTTTAAATACATCCAA  
TTGGATGTATTAACGAACATGAAAAACACGCAAGCTTACAGCCGTAAACGGTTGAGTTGGCGTTATTT  
CGATTGGGAGGTGGGTTGTGAAGACGCGTGGGACAGCGAGGAGGGGGGG  
CGCCCCCTCTCGCTGTCCACGCGCTTTCACACCCCACTCCCAATCG  
GTGAGTTTTAAGGTAATACAGCTCCGGCAAGACCCGTAGTGCGTGTCTCAGAAACACCGCCAGGCTGGATG  
CATCCAGCCTGGCGGTGTTTCTGGAGCACGCACTACGGGTCTTGGCGGAGCTGGTATTACCTTAAAACTCAC  
CCCATTAGATAAAAGTCGAGGCATATGCGCCGCAATCTTCGTGAATCTCGGTGACGCGTCCCGAC  
GTCCGAGCGGTACCGCGAGATTACGAAGATTGCGGCCATATGCCTCGACTTTTATCTAATGGG  
GCCGATTTATGTGCAACGTTGTTTGCATTATGGAGGACTCGATATTGTTCATATTA  
TAATATGAACAATATCGAGTCTCCATAATGCAGAAACACGTTGCACATAAATACGGC  
GGAATGACAATATAGTAGTAAATCTTGGAGAGAAATACCCACACCATGACCGTGAATGGGG  
CCCCATTCAGGTCATGGTTGGGTTATTCTCTCAAGATTTACTACTATATTGTCAATTC  
CCCAGGACGCCGAAACAAAACCCACGTTTACGTCTGCCACCGCCAACAGGCTCCACAATCGTACGATTAGA  
TCTAATCTGATGATTTGTGGAGCCTGTTGGCGGTGGGCGAGCGTAAACGTTGGGTTTTGTTTGGCGCTCTGGG  
CTCCAGGCGTCATTGCAACGCCCTATTAGACGGGCAAGGCTAAGACGTTCCGCGGT  
ACCCGGGCAACGCTTACGCTTGGCCGCTAATAGGGCGTGCATGACGCTGGAGG  
CTGTACACACAAGGGCCCTTAACAATGCACCTGAACCAACCAAGCTATGGACGCAACGAGATTACCTTGGTTAGAG  
CTCTAACCAAGGTAATCTGCGTTGCGTCCATAGCTTGGTTTGGTTTCACTGTCATTTGTAGAGCCCTTTTGTCTGTACAG  
TAAACGCTTTAATAATGGAATTTCCATATCATTTCAACCGTATCTTATAACGGCGTAACGTTTTATTTAACGAGCGTGTACCAAG  
CTGGTACGACGCTGTTAAATAAAGCTTACGCGGTTTAAAGATACGGTTGAATGATATGGAAATTCATTAATAAGCGTTTA  
CCCCCGGGGTCCGCGGGGCGCCAGAAACCGGGGGGGTTATTTTGGGGGGGGTCCGACGAGCCCCCGCTCGCCCGCCCCAC  
C  
TGTGCGGGCGGGGACGGGGGGGTGGTGGACCCCCCGGAAATAACCCCCCGGTTTCTGGGCGCCGGCGGACCCGGGG  
G  
GTACGCGACAGAAGTTTCTTCTGTTTCCATGAATAACAGCCTCTAGCATGTAGAAAAATG  
CTATTTTCTCATGTAGAGGCTGTTATTCATGGAAACGAAAGAACTTCTGTGGTTAC  
ACCACTTTGGCGATGATTTCTCGCATTAAGGTCTGGGGATGGTTAAAGGGAAACAAATTTCCAGTCTACAGAG  
CTCTGTAGGACTGGAATTTGTTTCCCTTTAACCATCCCCAGACCTTAATGCGAGAAATCATCGCCAAAGTGGT  
CTGTAACCAAGAAAGTTGATCGGATTCAGCGGTTTCAATGAGTCCAAACGGTGGCTAAATTACGAGCCATCTGTTG  
CCAACAGATGGCTCGTAATTTACGACCGGTTTGGACTCATTTGAACGAGGCATGCCGATCAACTTCTTGGTGTCTAT

CAGTCGGTTCTACGGTGCCGTAAGAAGAGTACCCGAGCGGGTAC  
GTACCCGCTCGGGTACTCTTCTACGGCACCGTAGAACCGACTG  
CATCCAATTGCAGTTCCAGGCTAATTCCCGGGTGGTGTGTTAATCCACGAAACCAGATCCCTCCATATAACGCCCGC  
CGCGCGGTATATGAGAGGGGATCTGGTTTCGTGGATTAAACACACCCACCCGGGAATTAGCCTGGAAGTCAATTGGATG  
TACGTTTTCATTTACCGACGGGTCTTACAGCACAGCGGTGTTCGGCTA  
TGACCGGAACACCGCTGTGCTGTAAGACCCGTCGGTAAATGAAACGTA  
GAAGCCGTACGGCTTGACATCAGGTTTTGAAACCTGGCGCTCAAACATTACAGTCATCGTTACTTGAAG  
CTCAAGTAACGATGACTGTAATGTTTGACGCCAGGTTTCAAAAACCTGATGTGCAAGCCGTACGGCTTC  
GCGAATTCCTCCGGTTGACGCTATTCCACATTGACACTAAGGAAATTTGGCGGGAGACATGCGCCCAAG  
CTTGGCGCATGTGTCTCCGCCAATTTCCTTAGTGTCAATGTGGAATACGCTGCAACCCGAGGAATTGCG  
CAAGTGTCTCAGAAATTACATGCATTTATGATTTTACGGGGTGGGTACGATAATAGCTAATTAACAAACACCCCAATAAAGGTTG  
TACAAAAAATCGTTTATGGG  
CCCAATAAAGCAITTTTGTAGAACCTTTATGGGTGTTTGTTAATAGCTATTATCGTAACCCACCCCGTAAAAATCATAAATGCAT  
GTAATTTCTGAGACACTTG  
ATAACATCTTTGTAATATACCGTCGCCCTTAACTTGTACGGCGCAATGTTTTCTTTATAAAACA  
TGTTTTATAAGAAAAACATTGCCGCGTACAAGTTTAAGGCGACGGTATATTACAAAGATGTTAT  
TAACTACACGCCAAACATTCAAAACACCGTGGTATCATTAACGTGATATGAAAGATCCAATCAATCAACACACCTCTACC  
GTTTAGCAGCTCAGCTAT  
ATAGCTGACGTGCTAAACGGTAGGAGGTGTGGTTGATTGGATTGATTGGATCTTTTCATATGACGTTAATGATACACGGTGTTTGA  
ATGTTTGGGTGTAGTTA  
ACGCGGTGTGTTCTCGCGCTCCGTGATATTTACTAATGCTTATCTCAAAACGTCCTTGTGCTGTTTTAGGAATAAG  
CTTATCTCAAAACGACCATGGGACGTTTTAGGAATAAGCAATTAGTAAATATCACGGAGCGGCAGGAAACAACCGCGT  
TAGCAGATATGGGCGCGACAAAGTTGTGGAGGCTGCCAGAAAAACATACGTGATTTTTTTGAAACATGTTTTGTATGCCG  
CGCGGATCAAAAAACATGTTCAAAAAAATCGACGTATGTTTTTCTGGCAGCTCCACAACCTGTCCGGCCCATATGTGCTA  
TGTGATCAAAAAACAAACGGTTGTAAACATGCAAGTTCTTGTCCAACATCGGAACTCGACGGACCTATCACCTATTGCG  
CGAATAGGTGATAGGTCTCGGTCGAGTTCCGATGTTGGACAAGAACTTTGCAATGTTTACAAACCGTTTGTGTATCACA  
CGAGGCACTGACAGACTCTCGCATGCATTAAACGCTGGATATGGGATTATGGAAGTCCATCTCGAC  
GGTCAGGATGGACTTCCATTAATCCCATATCCAGCGTTAATGCATCGCAGAGTCTCTGAACCTGCCTCG  
CCCTTTGTGTGTACAGAGGCTTAGTATTATGTAACCCCCCTATGGATGTCATATATGTTATTAATGGGTTATAAACTTTCAAAAT  
TTACCGCCCGTTTTATCCGCGGCCACGATCCCGGGGACAGTTCCGATAGCGCTAATGTAGC  
CGCTATTATTAACACATCTCTTAAATCCCGCTTTATCTCCCTAAAAACGGA  
CTCCGTTTTAGGGAGATAAAGGCGGGATTAAAGGATGTGGTAATAAATGACG  
CTTAGGGGATGTCCTCTCTCCGCGATAATTTACCACGCCACATACCCCACTCCCAATAAAAGCCCTG  
CAGGGCTTTTATTGGGAGTGTATGTGGCGGTGGTGAATTTATCGCGGAAGAGGAAGACATCCCTAAG  
ATATGTTTCCCTGACGATAGATGGCCATTCCCGTTGAGTCTACAGTTAATTTGATACGACTTTCACGTCCCATCCAC  
GTGGATGGGAGCTGAAGAGTCTGATACAATTAATCTAGACTGACACTCAACGGGAATGGCCATCTATCGTCAGGGAACATAT  
GTTCTAAAAACACTGTGACAAACACTTGGCGTGTAAACACTGTACGCGAGAAAG  
CTTCTGCGTACAGTGTAAACACGCCAAGTGTCTGACAGTGTGTTAGAAC  
TGACTGAACACCTTACCAAAAAAAGCTCTGCGCGTAAAGCGGGTAAAGGTATTCCAAACAGATGAAGAAGTCTAGTTTGTG  
TGAGGGGAAGGAATGCTTAAACATCCACGGTCTGCTTTATTACCACTGTATGTAATTTATGA  
CCAATAGCAACACTCAGGTATTTTTAAATGCAGTTAATGATCAATAATTTACATACAGTTGGAATAAAGCAGACCGTGGATGTT  
AAGGCAATTCCTTCCCTCCCAACAACTAGGACTTCTTCACTCTGTTGGAATACCTTTAC  
CTTCTGAAGCGTTTCCAGATTGCCCGTGTGGGACAAGGTCTGTCCCTTACCCCTCGGGGGTATTTTGGGTTG  
CAACCCAAAAATACCCCGAGGGGGTAAAGGACAGACCTTGTCCACACGGGGAACATCTGGAACGCTTCAAGAAG  
CGTCTGACCAACACTCCCGGAGAAATAACTTTACATGCGTATGGATTTTTCGGAAGCCCGGGGGTGTGAAG  
CTTACAAACCCCGCGGCTCCGAAAAATCCATACGCATGTAAAGTTATTTTCCGGGAGTGTGGTGTGACAGC  
GGAAGAAACTACACTATCGGCATTACGCGTGGCCAAATGAGGTCAATGAGCTACGCAATTGAATACG  
CGTATTCAATGGTAGCTCACTTACCTCATTGGCCACGCGTAATGCCGATAGTGTAGTTTCTTC  
GTTAGAACACACGCCCGGTACAATTACCCCGCAGCGGTACACCCCGAGACGTATGTTCTGT  
ACAGAACATAGCTCTCGGGGTGACCGTCCGGGGTAAATGTACCGCGCTGTGTCTAAC  
TTGTGCGCTACCGCTTAAGTTTGTAGACGGTGACGCGACAAGATGAGCGAGTGTACCGATGTTGTGGAGAACTTATCCATTGCCG  
TATTAACCTACGAT  
ATCGTAGGTTAATACGGCAATGGATAAGTTCTCCACAACATCGGTACACTCGCTCATCTGTGCGCTACCGTCTCAAAACTTAAGG  
CGGTGACCGGACAA  
TATCAGAATTATTTGCAGATACTGTAAATTTAATTAAGATGAGGCGTTCGTA  
TAGCAACGCTCATCTTAAATTAATTTACAGTATCTGCAATAATTTCTGATA  
GTTCACTTTGGGTGCGGTAATGCTCTGGCTAGCTTAATTGCGGCTCTTCTGAATATACCGGGA  
TCCCGTATATTACAGAAGCGGGCAATTAACGTAGCCAGGAGCAATTACCGCACCCAAAGTGAAC  
GCCCGACACCGGGGAATATTACGGGTCTCGGATCGCGGCAAGGAAATGATTCTGTCTGTGGCGCCCGGTTCCCGCG  
CGGGGAACCGGGGCGCCAGAGACAGAAATCATTTTCCCTGCGCGATCCAGAACCCCGGATAATTTCCCGGTGTCGGGGC  
ATAAGGTAAATCTAGGACATTATCCGGCGGAATAGAGTCACTCCGATAGATTA  
TAATCTATCGGATGACTCTATTCCGCCCGGATAATGTCTAGATTTTACCTTAT  
CCATATACGAGTGCGCGGGGTTCCCAACGTAGCACAGGCCACGAGCGTTCCAGGGGACGG  
CCGTCTCGGGAACGCTCTGTGCTGTGCTACGTTGGGAACCGCGCGCACTCGTATATGG  
AACAAACCTGTGTTTGTGCGCGGTGGGAACGTGCGATACACCGTGTGTACCCGCGCGGGCCCCAAGACCCGCGTCCC  
GGGACGCGGTCTTGGGCGCGCGGGTATACACGTTGTATGCGAGCTTCCACCGCGGCACAAACACAGGGGTGTT  
TATTTCTAATGATAAGACGATGTAGTATTGGACGAGACTCGAGGCGGAAGTTCATGGACCATAGTATGCGTTTAAGGAGAGACC  
GCTGGT  
ACCAGCGGTCTCTCTTAAACGCATACTATGGTCCATGAACCTTCCCGCTCGAGTCTCGTCCAACTACTACATCGTCTTATCATTAAG  
ATA  
TTCCAAATTTAGCTGGGTATTAAATCCCGGAGAAACAGCTTAAATAATAACGAACGTGCAACAGTTAGCCGCTAACCGA  
TCGGTATCGCGGCTAAGCTTTTGACAGTTCGTTATTATTAAGCTGTTTCTCGGGGATTTAATACCGAGCTAAAAATTGGAA  
CTCCAGGCACCCCGTCCGACCTCTAGTTCCCGGTGTGATCTGGG  
CCACAGATGCAACCGGGAACTAGAGGTTGCGGACGGGGTGCCTGGAG  
CTCTAACACAACCCAATCTGTGTGTGACATTTGTTAACCAACTGACCCGCAAAATATAAAAAAC  
GTTTTTATATTGCGGGTCAGTTGTTTGAACAATGTCAACACACAGTTGGGTGTGTTAGAG  
ACGCAAGTTTGTCTTACCTCGCTCTCACACCCCGGCCACTTCCGGCCATTGTAATAACTTTAATTGCG  
GCAATTAAGATTATTACAACTGCGCCGAAGGTGGCGGGGTGGTGAAGGCGAGGGTAAAGCAAACTGTGCT  
CTGCGTGTGTTGTTTACCCCATTCGGCGTGGCGATGCTAACAAAGGTGGAAGGAGCAAAAAACCG  
CGGTTTCTGCTTTTCCACCTTTGTTAGGCATCGCCACGCCGAATGGGGTAAACAAACGACGACG  
CTGTCTAACGATAATACGAACGGAGACATGCTTCGTAAGCAGTTTGAAAGGGTCTC  
GAGACCTTTCAAACCTGCTTACGAAGCATGTCTCCGTTCTGATTATCGTTAGAACAG  
CTACGTTTCTAATGTAACAGCGTTTGACATAGCAACTACGGCTATTTTATTG  
CAAAATAAATAGCGTAGTTGCTATGTCAACGCTGTACATTAGAAACGTGAG  
CAATAAAAGCCCTGTAGAGCGCATTTGGCATCTTACTTGAGATTGGATACGCTCGGCCGACTTGGTCTGTTTACGCTCTCTTAAACA  
ACATGGCTATGCCATTG  
CAAAATGGCATAGCCATGTTGTTAAGGAAGCGTGAAACAGACCAAGTCGGCGGAGCGTATCCAATCTCAAGTAAGATGCCAATGC  
GCTCTACAGGGCTTTTATTG  
GGAGAAACATTAAGCCGGGTATTATTAACGGCTGTGGTCTGCTTACGGAAATTTGCTTCCCGGAGACACAAAGATTATCGG  
CCCGATAATCTTTGTGCTCGGGGAAGCAAAATTCGCTGAAGCAGACCAAGCCGTTAATAATAGCCCGCTTATGTTTCTCC  
GTGTATAAAAGCCTCTGTAGCCTCGGTAGATATGGCGCATAGCGCGCGCGGCAAGTACCGTTCCGGCTCGTTCAT  
ATGAACGACGCGCAACCGGTACTTCGCGCGCGCTATGCGCCATATCTACCGAGGCTACGAGGCTTTTATACAC  
CCCGATATTGTTCTTGGGGTTACGTTTACTGCATATGGATCCCCACCAATTGAAAAATGCATG  
CATGCAATTTCAATTGGGTGGGATCCATATGCAAGTAAACGTAACCCCAAGAAACAATATCGGG  
ATTAATAAATATGGCGGTACACAGACCGCTCTTTGACATAAGTTTCTCGAATGGTTTACGGCGGATGGCGTTCTGG  
CCAGAACCCATGCGCGCTCAAAACATTCGAGGAAAACTTATGTCAAAGGAGCGGTCTGTGACCGCCATTATTTTAAT  
TCTTCCCGGAGGGGTGATGGGACACTTCCATTAAAGTAGCGGTAAAGCACTGCGTCTGGGT  
ACCCAGCGCACTGCTTACCGCTACTTTAATGGAAGTGTCCCATCGACCCCTCGGGGGAAGA  
CGTACTACGGGTACCCGGGATGCATCGCAGATGTCTTTCGTTTGGTGTGAGTCTAGGAACAAACCAACCCCTGAAATCTTGC  
GCAAGATTACAGGGGTGGTTTGTTCATGACTCAACCAACGAATGACATCTGCGATGCTCCCGGGTACCGGTACTACG  
TCCGATTCTATTGTTAATAGAAATACGTTTAAAGTCTCTTGGTTAATTTGATGCTAACTTCCCGATCGGGCTCC  
GGAGCCCATCCGGAAGAGTTAGCACTCAAAATTAACCAAGACGACATTAACGTATTTATTAACAATAGAATCCGA  
ACTTGGACGTGGGTGGATATGAAATTTTCAAAGCATGCTACGGTGCATATATGCGCATATCCCGAAGAGAGTTTGATTACC  
GGTAAATCCAACTCTCTTCGGGATATGGCATATATCGACCGTAGCATGCTTGAATAATTCATATCAACCCACGTTCCAAAT  
TTAAATTTGCTTCAAGACGCCCTTGTATATGCTCATTAACACGCTGCGGAGAGAAAGTGCAATTCGGTGTCAAGACCATG  
TGAA  
TTACATAGGTCTTGACCACGGGAATGCATTTCTCTCGCCAGCGGTGTTAATGAGCATATACAAGGGGCTGCTGTGAAGCAAAA  
TTTAA  
CTATGAGCGGTGCGGTACGACCGGGGCCAAAAACACTTTATCTACAGAGTCTCCGACAGCGCTT  
AAGGCTCTCGGAGACTCTGTAGGATAAAGTGTTTTTGGGCGCGTCTGATACCGACGGCTCATAG  
CAAAATAACCAAGTCTTATGCGGACCACTTTTGGATCAACGTGTTAAAGCTCGTATTTCTCGGCGAGCTTATCTCCGTTTC  
GAAACGGAGATAACGTGCGCGGAGAAATACGAGCTTTAACACGTGTATCCAAATGGTGTCTGCTAAAGCACTGGGTAAATTG  
CAGACACGGCTCTCGTATCGTGGTATCTGTAGTCGGGGAAGCTCAACCCGAGGTTACTTATCCAGACGAGAGTTCGATGAATTA  
CAC  
GTGATAATTCATGCAACTCTGCTCGGATAAGTAACCTCGGGTTTGAAGTCTCCCGACTACAGATAACCAAGATACGAGAGCGGTG

CTG  
GGCCGTGTTTGCATCGTCGCGCACCTTTGGGCCAGCGAGTTTTGCTCGTATCGAGACTGCGTTTGCCAACC  
GGTTGGCAAACGCAGTCTCGATACGAGCAAACTCGCTGGCCCAAAGTGCGCGACGATGCAAACACGGCC  
TGGGCTTCTGAAATTTATCGGGATCAAACCCGCTATTTACCGACGGTTCAGTGTTTTGTGAGTCGCCAATTTCTTC  
GAAGAAATTGGCGACTCACAAAACACTGAACCGTCGGTAAATAGCGGGTTTGATCCCGATAAATTCGAGAAGCCCA  
CTCCGATGACGATCCCCACGACGAGGAAGAGGATGAAGACGAAACAACTCAGACTCT

AGAGTCGTGAGTTGTTTCGTTCTCATCTCTTCTCTCGTGGGGATCGTCATCGGAG  
CCCTTTCAAACCTGCTTACGAAGCATGTCTCCGTTCGTATTATCGTTAGAA  
ATCTAACGATAATACGAACGGAGACATGCTTCGTAAAGCAGTTTGAAAGGG  
TATCATTAAGAATAATTTACACGGTGACGACACGGGGAGGAAATATGCGGTTCGAGGGGGG  
CCCCCCTCGACCGCATATTTCTCCCGTGTCTGTCACCGGTGATAAATATTTCTTAATGATA  
ATAAATGTAGTCTTGAATCTGTCTTTACGCGTTTGGCGGTCTCCGTAAT  
ATTACGGGACGCGCAACACGCGTAAAGACAGATTCAAGACTAACATTTAT  
AGCAGATTGCTAGGGCGTCATATTTCAACGCGGTGTTTACTGTGGTG  
CACCAACAGTAAACAACGGCGTGAGAATATGACGCCCTAGCAATCTGCT  
AGCTGTGTCGTATTATGATTAAATAAGCCGGTTTTCATCACAATGGA  
TCCATTGTGATGAAAACCGGCTTATTTAATACATAACGAACAAGCT  
TGCCCTTGCCCTTCCCAAGTACACCGGGTGATAAATCCACTTGAAAGTTTGTATCG  
CGATACAAACTTTCAAGTGGATTATTCACCCCTGGTGTACTTGGGAAGGGCAAGGGCA  
CTCCGCAACCCCTCTGCTTCACTTCCCTACATACGTTCTCCGTGA  
TCACGGAGAACGTATGTACGGAGTGAACGCGAGGGGGTTCGGAG  
AAATTCTAACAACTCTGGAGTCTCAAATGATGTAACCTACACAACACCCGGTTCTACCAACGCACTGTTCTTTAAGACGTCCACAC  
GTGTGGACGCTTTAAAGAACAGTGGCTTGGTAGAACCCGGGTGTTGTAGGTACATCATTGGAGACTCCAGAGTTGTAGAAATTT  
TCCGATTACTGTGTGGTTATTTCCAAACGAGGCAAGTTGTGACGTTAAGAAAAATATTGCCACATTTAC  
GTGAAATGTGGCAATATTTTCTTAACGTGACAACTTTGCCCTCGTTGGAATAACCAACAGCAGTAATCCGA  
GAAGTTGGATTATTTGAATGTTGTCATACGATTAATAACAATTGAACGGGGGGTACTTGAATAGACGCGGTTTCTGTACGTTT  
AAACGTACAGAAACCGGCTCTATTCAGTAAGTAACCCCGGTTCAATGTGTTATTATCGTATGAACAACATTCAAATAAATCCAACTTC  
CACAAAAACAGATTGGAAGGTGCTGATGTGCTGGCGCTGTGG  
CCACAGGCCAGCACATACACGACCTTCAAATCTGTTTTGTG  
TTATAGTGACACTAATTTATTTATGGGGGTGGGAATAGAGAAGCAGAATCTGTCTAGAATAGGTCCGATTAAAC  
GTTAATCGAACCTATTCTAGACAGATTCTGCTTCTCTATTCCCAACCCCATAAATAAATTAGTGTCACTATAA  
GTCCATTTGAGACTCCCCACTAGAAAAAGAAATCCAAATCCCTTTGATCCATGCTCT  
AGAGCATGGATCAAAGGGAATTGGATTCTTTTCTAGTGGGGAGTCTCAAATGGAC  
ATGACATGGTTAAGACCAACGGTTGGCTTAAACAGTACGTTTAAAC  
GTTAAACGTCAGTTTAAAGCCAAACCGTTGGCTTAAACCATGTCTAT  
CAGATGCACAACTGAGGAATGTACATCTGCTTCTCCGCTCGGCAGCAGCGTCTCCAGGGAATCCAAAACCTTGCCATGCGCGTTAGT  
ACTAACCGCATGGCCAAAGTTTGGATTCCCTGGAGACGGCTGCTGCCGAGGCGGAAGAAGCAGATGTACATTCCTCAGATTGTGCATCTG  
GCATACCCCGGTCCCTGCGGACGAGCTCGCAAGGCGTACTGTACCCCGGAAACCATCGCCCGTCTGGTCGAC  
GTGACACAGACGGCGCATGGTTTTCGGGGGTACAGTACGCTTTCGAGCGTTCGCGACGGGACCGGGGTATGC  
CCATCAAATTCAGCAACACTGCGCGGTAGGCCCCGCAAGGCGATATAAAAAGACGCTCTGCTG  
CAGCAGAGCGTCTTTTATATCGCTTTCGGGGGCTACGCGCGCAGTGTTCGTGAATTTGATGG  
TAATCTATCGGATGACTCTATTCGCGCCGGAATAATGCTCTAGATTTTACCTTATGTGTTATTTAATGTATCTGGA  
TCCAGATACATTAATAACACATAAGGTAATAATCTAGGACATTATCCGGGCGGAATAGAGTCATCCGATAGATTA  
CACCGGAAGACATGGCGGTATCATCCAATAATAAATCTGCGTGTTTTGGATCGAGTGGCCTTACTTG  
CAAGTAAGGCCACTCGATCCAAAACACCGAGTTATTTGGATGATACCGCCCATGCTCTCCCGGTG  
GAGCGTTTAAAGTTGGGTACGTTTTTAAAGCTTGGATGGCAACGTTACCGCAATCAATCTTAGATCCAAAGGGAATAAGCGGTGGGAGGCTCCAAAAGGCAATTTGAGCGTTTTT  
AGTCCGCTTGAACCGGTCTAAGTATTG  
TTATACACCAAATCACAGTCAAGTATTAAGCTTTACAGTCCCCCGTTATCTGATATAATCACTTTTCTTAACACGTATCGGGAACAGATGTTTATATTATACCTTCGCGGTCAATTATG  
GCAAACTACTAGACCGTTTCAAGCGG  
TATCTTTTAAACACCGATTTCGAATAGTTTGGCTACAAAACATATCACCTGTAATGTATCCATCTTGGAACCGGAGTAAATAC  
GTATTTACTGCCGTTTCCAAGATGGGATCAATFACAGGTGATATGTTTGTAGCCAAACTATCCGAATCCGTTGTTTAAAGATA  
TACCCCGCGCACCGGGCTCTCATGAACGACGCCGAACGGTACTTCGCGCGCGGCTAT  
ATAGCGCGGCGGCGAAGTACCGTTTCGGCGTCTGTCATGAGAGCCCGGTGCGCGGGGTA  
CTTTAATGTGGCAGCAAGTCTCTTTACGCTACCAAACCTTAACTATCTTTTGAAAGACCGCGATG  
CATCGCGTCTTTCCAAAAGGATGTTAAAGTTTGGTGAGCGTAAAGAGGACTGTCTGCCAACATTAAAG  
CTTGCTGTCTCATTTCTAGGTTTGTCTTAAATACACCCGCCATGAGCATCTC  
GAGATGCTCATGGCGGTGATTTAAGACAAAACCTAGAAATGAGAACAGCAAG  
GCATTTTTTCTTAGAGCTTAACTGGCAGCTTCCAGTGAGAT  
ATCTCACTGGAAGACGTGCCAGTTAAAGCTCTAAGAAAAAAGTGC  
GCCCAACGCGGTGAGCGCTTTCGCGGCGGTATATTCGCGGTTTCTGCAACCCGCTATCGCTCGATGGCAGCGTGGGGTCTCTTTGG  
CCAAAGAGACCCAGCGTGCATCGAGCGATACGCGGTGCAGAAACCGCGGAATATACGGCGCGGAAAGCGGCTACCGCGTGGGG  
TTCCGGCGCCTGTTTAAAGCGCGGTAAAGGGGTTTGATTATTTAGGACGTAGCCAAACACGGTAA  
TTACCGTTTTTGGCTAACGTCTTAAATAATCAAAACCCCTTACCCGCTTTAAACAGGCGCGGAA  
CTGCTAACCATAGACTGTCTACTGACTTTTATCATACGCAATTACGCAACCGGGAT  
ATCCCGGTGCGTAAATGCGTATGATGAAAAGTCAGTAGAACAGTCTATGTTAGCAG  
GTGTTATTTAATGTATCTGGAAGGCATTGGGCGCTCGGGGCA  
TGCCCGGAGGGCCCAATGCTTCCAGATACATTAATAAACAC  
CGTATTCAATGCGTAGCTATTGACCTCATTTGCCACGCGTAATGCCGATAGTGTAGTTTCTTC  
GGAAGAAACTACACTATCGGCATTACGCGTGGCCATGAGGTCAATGAGCTACGCATTGAATACG  
TAATAGCCCGGCTTAATGTTTCTCAAACATATAAAAGCTGCC  
GGCAGCTTTATATGTTTGGAGAAACATTAAGCCGGGTATTA  
ACCCTAGATGTAGTTACAGCGAGTTGATCTTGGCATGCGGTTTCTAGAAACACCTCGA  
TCGAGGTGTGTTCTAGAACCGCATGCCAAGGATCAACCTCGCTGTAACATCATCTAGGT  
TGTACGTACCAAACGAAGCCAGTTTTTCATTGGTGTATATGCGTATGTTGGAGTTACCAGAAGTTTGCAGGAG  
CTCTGCAAAACCTTCTGGTAACCTCAAACATACGCATATACACCAATGAAAAACCTGGCTTGGTACGTACAT  
ATGTCTATCTGGTGCTAACACACGCGCATCCGTCGCCATTGTCCCGTGTTCATTTCGG  
CCGAAATGGAACACGGGACAATGGCGACGGATGCGCGTGTGTTAGCACCAGATGACAT  
GACGGACATCGGTTTTGTCTGGAAATTTACACACGGGGTCTGCAAGTCAAT  
ATTGACTTGCAGACCCCGTGTGTAATTTTCCAGACAAAACCGATGTCCGTC  
AGGATGGACTTCCATAATCCCATATCCAGCGTTAATGCATCGCAGAGTCTCTGAACTGCCTCGGGGGTTAATTTGCGCGCT  
AGCGCGCAAAATTAACCCCGGAGGCGATTACAGACTCTGCGATGCATTAACCGGGGATATGGGATTATGGAAGTCCATCTC  
GCCACGATCCCGGGGACAGTTCCGATAGCGCTAATTGTAGCA  
TGTACAAATTAGCGCTATCGGAACTGTCCCGGGATCGTGGC  
TCGGCGGACTACGTCCTGCTACATCGGCAGGAATTGCACGAGGGCAA  
TTGCCCTCGTCAATTCTGCGCATGTAGCAGGACGTAGTCCGCCGA  
TTTTATTAACCTACCATTTTTCGTTTAAACGGGATTTGTGG  
CCACAAATCCCGTTAAACGCAAAATGGTGAGGTTAATAAAA  
AAAGAGAAAATAGGTTTCAGGGTATGCGTACCAATCCCAAATCCCTATGCGTTAGTGGG  
CCCCACTAACGCATAGGGATTGGGATTGGTACGCATACCCGTAAACCTATTTTCTCTTT  
TTGCGCTACAATATCACCGCAACGTTATGCACACAGCGTGCCCTTACCCTCCTCACCCACCAACAGGCTTGGCGGCTTTTAAATTACCACTCCGTTTATAGG  
CCCTAAAACGGAGTGGTAATATTAAGCCGCCAAGCCTGTGTGGTGGGTGAGGAGGGGTAAAGGCACGCTGTGTGCATAACGTTGGGTGATATTGTAGCGCAA  
CCGCGGCTTTGGGGGGGACCATCGGGGGGAGCTTGCATTACCCATGCCAGTATTGTCTGTACGCTCTAATTGG  
CCATTAGAGGCGTACAGACAATACTGGGATAGGGTAATGCAAGTCCCCCGGATGGTGCGCCGCAACACGCGCGG  
ACCCCGGAAGAAACCGACATTCCACCGAAGAGTTAATTGCGCGTGTATAT  
ATATACACGCGCAATTAACCTCTTCGGGTGGAATGCGGTTCTTCCGGGGT  
ACICTTTAATCTGCAITTCGCACTTCCGTTTTTTCACITGATGGGTTTTCATGTTTTGGCATGTGTCCAACCACCGTTCGCACTTTCTTT  
AAAGAAAGTGGAAACGGTGGTTGGACACATGCCAAAACATGCAAAACCCATACAGTGAAAAAACGGGAAGTGCGAATGCAGATTAAGAGAGT  
TGTTTTCTCGGTTTGGCGGTTCCTTTTCCAGCGATAGTAGAACCGGTAAATCTTATGATGGTAGTTACCAAAGTTTTAA  
TTAAACCTTTGGTAACATACCATATAAGATTACGCGTTCTATCATCGCTGGAAAGGAACGCGCAAAACCGGAGAAAAACA  
CCCCCGCACATTGCGGATCAAAGCTCGCTTCGGTTGAAATTAACATTATCGAC  
GTGATAATGTAAATTTAACGGAACGAGCTTTTGTATCGCAATGTGCGGGGG

GTTATTGGCTCGAGATCCATATGGACCTGCCGTGGACATATGGAGTGCCGGGATTGT  
ACAAATCCCGGCACCTCCATATGTCCACGGCAGGTCCATATGGATCTCTAGCCAATAAC  
ATGAAACTGGTCGCGTGGTAGACGATCATAGCAAAATTGATA  
TATCAATTTTGCTATGATCGTCTACCACGGCAGCAGTTTCAT  
TCATCGCGTTCAACCTTTGGGTTACAGATACCAACAGCCTGAAGATCTGG  
CCAGATCTTCAGGCTGTGGTATCTGTAACCCAAAGGTTGAACGCGATGA  
ACCGGATAAAAAGCGTACTGTTTTTATTTAAATTTACACGCTCGACGTTGCCCGGTTCCGTTGATCACCGGGA  
CCCGGTGATCACCGAACCGGGCAACCTCGACGCTGTAATAATTTAAATAAAAAACAGTACGCTTTTATCCCGT  
TGTTATATTTGAACCTTCCGGATCTAATATAACAAGGTGGAAGTCGCTTATACGCCCCGATCTTCATATTGAAGTTTGGT  
AACCAAACCTTCAATATGAAGATCGGGGCGGTATAAGCGACTTCCACCTTGTATATTAGATCCGGAAGGTTCAAATATAACA  
CAGTCAACCCATCCGAGTGAATCTTAAACCTGACCCGTGGCGTCGTTTACACAAGTTATACCGCCACTGGCGTTGGAAACAACGTG  
CACGTTGTTTCCAACGCCAGTGGCGGTATAAATTGTGTAAACGACGCCAACGGGTAGGTTTAAAGATTCACTCGGATGGGTGACTG  
CGAAAAGGTGTTGTATTTAAATCTTGAGAAGAGATGGGTGTTTCGAGCGTGTAAATGCATTTGCACATCGTTG  
CAACGATGTGCAAAATGCATTTACACGCTCGAACCCCATCTCTTCTCAAGATTTAAATACAAACACCTTTTCG  
ATTGACGTTGGTCCACATTTACAAATTTATGCTCTGTCATCGCCGTTTAAC  
GTTAAACGGCGATGACAGACATAAAATTTGTAATGTGGACCAACGTCAT  
CATTGCTTGATGTTGAGGCCACACTTGTGCCCTCCGCCAACAAACATTAGATC  
GATCTAAATGTTGTTGGCGGAGGGCAACAAGTGTGGCCTCAACATCAAGCAATG  
GGGCGCGCGCGTCTGTTATTCAGATGATTGCTTAGACGACATTTAAAAACGGGTCTCGCGTCTCAGCG  
CGCTGAGACCGCAGGACCCGTTTTTAAATGTCGCTAAGCAAAATCATCTGGAATAACAGACGCGCGCGGCC  
CCCATTAGATCTGACCCCTCTCGCATACGTAGTCGTTGTGTTAGTCTCTCGCCAACATCTTCCGTTCTGGGTTCTGGTT  
AACCAGAACCCAGAACGGAAGATGTTGGCGAAGAGCTAACACAAGACGACTACGTATGCGAGGACGGTCAAGATCTAATGGG  
TACAAAACCTGACCAAGAACTTACAGCAACTCAGGCAAGTATTC  
GAATACCTTGCGTGAAGTGTGCTGTAAGCTTTCTGTCAGGGTTTTGTA  
CGCGATGGGAGGGGGCGCGGTACCCCGCGATGGGAGGGGGCGCGGTACCCCG  
GGGTACCGCGCCCTCCCCATCGCGGGGTACCGCGCCCTCCCCATCGCGGGGTACCGCGCCCTCCCCATCGGCG  
CCCATCCGGTTACCAAAAAACCCGCAAGCGACCCCGCGGGCGCGCTTTGG  
CCAAAGCGCGCGCGGGGTGCGTTGCGGGTTTTTTTGGTAACCGGATGGG  
ATACCTAAATCCTTCAAAACATGTTTACAAATACCAAACGTATACAGTCTTGTATGGGTTCCTTCGTACAGACCCACGG  
CCGTGGGTCTGTACGAAGGGAACCCATACAGGACTGTATACGTTGGTATTGTAACATGTGTTTTGAAGGATTTAAGTAT  
CAGGGAATGTTTTCGGCCATGGTATCGTACTCTGCAGGAACGGCTGTGCTTAGATAGGCCG  
CGGCGCTATCTAACACAAGCCGTTCAGCAGAGTACGATACCATGGCCGCAAAACAAATCCCTG  
TTGTTGGCGCATGCCATTGGCGTGGGTACTCTACCCCGGGTTGTT  
AACAAACCGGGTGTAGGAGTACCCACGCCAATGGCATGCGCCAAACA  
CCAGGGTTCGTCAGGGTCCACTGGAGGACCAACAATTTCCGGAATTCGAT  
ATCGGACTTCGCAATATTGTGTGCTCTCCAGTGGACCTGCAGGAACCCCTGG  
TACCGGACCCCTGGGATGTTTACAGGCGCGTTGTGTGTCGGTTATAAGTATGCAGTCGGGTCAATTATAACCGGAGGCAATCCCGCG  
CGCGGGATTGCGCGCGTTTAAATGACCCGACTGCATCTTATAACCGAGACAAACAAACCGCCCTGTAAAAACATCCAGGGTCGCGGTA  
CCAAAGCCGAGTTGAGACGGGAAATGTAAGAGCTGTTTTCCACGCGCAAAAAATCATCCGGTTGGGTATGTCTATAGCAATTAAGTTATTACAATGGCCGGAAGGTGCGCGGGGTGGTGAA  
GGGAGGGTAAAGCAAACTTGGCGAG  
GGGCGCGCGGTACCCCGCCGATGGGAGGGGGCGCGGTACCCCGCGATGGGAGGGGGCGCGGTACCCCGCGG  
CGCGGGGTACCGCGCCCTCCCATATCGCGGGGTACCGCGCCCTCCCATCGCGGGGTACCGCGCCCTCC  
CCCGCAAGTTTGTCTTACCTCGCTTACACACCCCGCCACCTTCCGGCATGTGTAATACTTTAATTGCTATAAGACATACCCAAACCGGATGATTTTTGCCGTGGAAAAACAGCTT  
CTAATTTTCCGCTCTCAACTCGGCTTGGAG  
GTTAAGTCCACCCCGCGCGGAACCCCGGTGGACCTGTACCCCGCCCGTTGAGCAATTGTACC  
GGTACAATTGCTCAACCGGGCGGGTACAGGTCCACCGGGTTTCCGCGCGGGGGTGGACCTTAAC  
CCCTTACAGAAAGCAGCGGTTAATGGGGCGGGTGC CGGGATTGACCGTATGTTGTC  
GCACCATACGGTCAATCCCGGCACCCGCCCATTAACCGCTGCTCTGTGTAAGGGG  
ACATCGGCATTAACAACAGTACGTGCCTAGGAACGCGAGAT  
ATCTCGCGTCTCAGCACGTACGTGTTGTTAATGCCGATGT  
GGTTCGCGCGAGGTTCGGTTCGCGAGGGCGTGGCGCAAAACACCCCTCG  
CGAGGGTGTTTTGGCGCACGCCCTGCCGGAACCCGACCCCTGCCGCGGAACCC  
CCGCTCAGCCCGCGCAGCCCTCCAGCCCTCCAGCCCGCGCAGCCCGTCC  
GGACGGGTGCGCGGGGTGACGCGGGTGGACGGGTGCGCGGGGTGGACGGG  
GGGACGCGGGGACGCACCGGGGTATCTTTTGGGTGAGCGTGTGTCGGTGGCCCGGGCGTGTGCGAGACCCGC  
GGCGGTCTCGCAGCACCGCCCGGGCCACCGACACGACGCTCACCCCAAGGATGACCCCGTCCGTCCCGTCTGTC  
GGGATTTTTTGGCGGGAACCCCGCCGCGCTTTAACAAAACCCCGCGCGTTTGGCTTCCACCTCTGTTTACTGCTCGGATGGCCACCGTGCAC  
GTGCACGGTGGCCATCCGAGCAGTAACAGAGGGGTGGACGCAAAAGCGCGGGTGTGTTTAAAGGCTGGCGGGGGGGTTTTCCCGGCAAAAAATCCCG  
CAAAACCTCGGTCTCTCCCGCCGAGCGCGGCGGATTTCCGCCAAGGCGCGGGATCAAGCTTACCGCAGGGCGCCAGGCGCGTGGGAAACAATGGGTCTGCGACACAGCGGCGATG  
GTTTCGGGGTACAGTACGCTTTCGAGC  
GTCCAACAGGTCCATTAACCTCAAAATATCAGGCG  
CGCTGTACTTTGAGTTAATGGACCTGTGAGC  
TGAACGATCTCATGTTCCGCTCCCACTATGACCCGTTCTCTCCAATAGTAGATCTGTCAGGTGACTCGAGGTGACCACCCGGGCCGTGTGTTGCGCGCCCGCGCGCGCGCTTCAACAGG  
TCCATTAACCTCAAAAGTATCAGGGAC  
CCCCAGCGGATGGATACCGCGCGGATGCAGCGCTCTACACCCCAACGCGCGGGTGCCTGTATCTTTGGAGTTAATGGACCTGTTGGACCGCGCCCGCGCGCGCGCAACACAGGGCCCG  
GGTGGTCACTCAGTACGCTGACGAT  
CGCGCGCCCGCTCAACAGGTCCATTAACCTCAAAAGTATCAGGCGACCCCGCGGTGGGTGTAGAGCGGTGCATCGCGCGCGTATCCATCGCAGCGGGGTGAATTTAGACGTACC  
CGAGTTTTC  
GAAAATCGGGTACGTCTAAATACCCCGGTGCGATGGATACGCGCGCGATGCAGCGCTCTACACCCCAACGCGCGGGGTGCGCTGTATCTTTGGAGTTAATGGACCTGTGAGCGC  
GGCGCGCC  
CGATACGGAGGGAATTGAACAGCATCTATGTTCCGTCCTCCACATGACCCGTTCTCTCCAATAGTAGATCTGTCAGGTGACTCAGGTGACCACCCGGGCCCTGTGTTGCGCGCCCGCGCGCGCGCTTCAACAGG  
GCCGCTCCAACAGGTTCATTAGATC  
AATGACCTGTTGAGCGCGCGCGCGCGCGCGCGGAACACAGGCGCCGGTGGTCACTTCGAGTCAAGTCTAAGTTGGGTCTAAGTAACTCACCCGAGGTGGTGACCTTACTAAACATATTATTATAAATTGGAGAGA  
CGTTTCAATTCCTTCGATATCGAGATCG  
CCAGTCTGTTTTCTACATGAATACATATCTTCTAGTTCGTCCATAAGGTCTAAGTTGGGTCTAAGTAACTCACCCGAGGTGGTGACCTTACTAAACATATTATTATAAATTGGAGAGA  
AACCTCAGACGACTCCGTTACCGATGTCAGA  
TATTTAGATTTACATGGTGTACCTCTGCGGAGATGATATTGCGCTTATGGGTTATACAACCTCGCAGTCTTAGCGTTAATGCCACAGTTTCACTGTCACAGGTAACGGAGTGCAGTGAG  
GGTTCTCTCCAATTTATAAATTTGTTTGA  
CTCGCGGTTTTTACCGGGAAGGCTGTGAGCAGACGAGCATATTACAGATTTCCAACAAACACTAGGATGTCTCGCTTATGTTGGGTGGACTGGCATACCAATTAGTGGAACGTACGCG  
TCTACTACCGAGTATGTGTTAAGCATATACAC  
TCTCGTTTACTGTCCGTGTATATGTTAACACATATCTCGGTAGTAGGAGCGTACGTTTCCACTAATTTGGTATGCCAGTCCACCCACTAAAGCGAGACATCTAGTGTGTTGTTGGAATCTG  
TAATATGCTGCTCTGCTACAACGCTTCCGTCG  
ACCTTTTACTTGGATACTGATGGGGTTCACCTTCGATATAGAGTGTGTTATAAATCAGTTGGGGTTAAACTTGGAAACCATGCTATGCAGTCAGGGTGGATTATCTTTA  
TAAAGATAATCCACCCGTGACTGCATAGCATGGTTCCAAAGTTTAAACCCCAAGTATTATAACACACTCTATATCGAAGTGGAAACCCCATCAGTATCCAAAGTAAAGGT  
GAGGAATGACACCCCAACAGACAAATATAGAAGATCATAGTCACTGTTAAGCTTGAACTCGCGCAAGGCGGGGACTTTCTTCCAATGCGGCCCTTACACGCGGTGTGGTCATTAACAT  
TCCAAGTCCCGTTTATATGCAACATAACACT  
CGTTGTTATTAAGCATTTGATAAAAAACAGCATGCGGGCTGCTGTTCTCATTTCTAGGTTTTGTCTTAAATACACCCGCCATGAGCAT  
ATGCTCATGGCGGGGTGATTTAAGACAAAAACCTAGAAATGAGAAACAGCAAGCCCGCATGCTGTTTTTATACAATGCTTTAATACACAACG  
GCCGGAACCCCGGAACATATAGGACGGGCAGTCCGTTGAATTGCATCATGAGGAAGTTGAAGCCAGATCAATATTCCCTTATGATAGTTTGGACTTTCCACG  
CGTGGGTCTTGGGACTCCAAAGGACCCGACGCCAGGTACGCGTCAAAAAAGCCTGTGACAAATTTCCCGGGGGCGGTATATAATTCCGGCGGGATGCATTTATTATCGGGCGACAA  
TCCAATAGTCAGAAAGTCCCG  
CGGACTTCTGACTATTGGATTGTCGCCGATAATAAATGCATCCGCGCGGAATTATATGACCGCCCGGGGGAATTGTACAGGCTTTTGTACGCGTACCTGGGCTCGGGTCCCTTG  
GAGTCCCAAGAACCCAG  
GAAGCCTTAAAGCGCGAGTGGTATACAGCAGAGCAGTCCATGGTTTTAGACCTCGGGCGAATTGCGTGGTTTTAAGTGACTATATTCCGAGGTCGCTGTAAATGGGGACAGTTAATAAAC  
CTGTGGTGGGGTATGATGAGGGTTCG  
ACGCAACGTTCCCGTGATATAACCGAACCCCATCAATACCCCAACACAGGTTTATTAACTGTCCCATATTACAGGCGACCCCTCGGAATAAAGTCACTTAAACACCGCAATTCCGCC  
CGAGGTCTAAACCATGGACTGCTCTCGTGAT  
CCCGTAGCTGCACGCGGAGTGTGATTTGAAGACGGCGCATTTCCCGTACGTTTATGAACACAACGGTAACATGTCTACAGTCCCGCGGAGAAATGTATGTTGGAGATAGAGCGTACT  
CCGCGTTCGAGTGTGG  
CGCACACTCGAACCGCGAGTACGCTCTATCTCCAACATACATTTCCCGCGGCACTGTAGACATGTTACCGTTGTGTTCATAAACGTACGGGAAATGCGCCCGTCTTTACAATCAACTC  
CGGTGCACTACGGG  
GGGTATGCGCCAGCTGAGGGATACCGTGGCTTTAATAAGGAAACCAACACCCACGGGATCTGATGAAATAATGGTGACCCCTCCGTGTGTTTGA  
GGAATCATCCCAATATGACTCCCGCTCAGGATCGTGGGCAAGGCAAGGCGGGGTGTTATTGCTGAATACA  
TGGTATTAGCAATAACACCCCTGCTTGCCEAACTCTCCAGGCATCGGTGAGTGGCGGAGTCATATTTGGGTATGATTCC  
TCACCCCGCTCTCTCGCAACTGGAATTCGGTTGAAGTTTTACGAAGTTTAAACATTTCCCTGAGTGGTATGACCTGTTGTCGGAGCAACTTAAAGAGCCG  
CGGCTCTTTAAGTTCGTCCGACACAGGTATACCACTCAGGGGAAATGTTAAACTGTCTGAAACCTTCAACCGAATCCAGTTGCGAAGAGACGGGGGTGA  
GCTATTATAATTCTAACATCAACAGTTGCGCGGGTTGACGTGTATTACAGATGATGAGATTAAAGCTTAAACCTATTGACTGTTTTATGG  
CCATAAACACAGTCAATAGGTTTAAAGCTTAATCTCATCATCTGAATACACGCTCAAAACCCCGCAACTGTTGATGTTGAATTAATAAGC  
CAAGAATATGCCAATGGATTATTAGTTATGTTTCGGCGGTACGAATTCACAGCAAAAAACAAATGGATTACCCACCCCGACCATCCAATGTAATGTTTATGGATTCCGGGATGGCGT

CTCTAATATGAAATATTCTGCTGTCGTTACCC  
CTATAGACACGTTGGGAAATGGATAGACGTCAGGGGTAACGACAGCAGAATATTTTCATATTAGAGACGCCATCCGAATCCATAAAACATTACATGGATGGCTGGGGTGGGTAATCCATTG  
TTTTTGCTGTGGAATTCGTACCGCGA  
CCCAACGTGTCTATAGGTATTATTGATGGACACATAGTATGTACGGCAAAATGTGTGCCACGTGGCGTGTACATTTTCGTATGGTGGGTTAACGATTCTCCCATCAACCACG  
CGTGGTTGATGGGAGAATCGTTAACCCACCATACGAAATGTACAACGCCACGTGGCACACATTTTGCCGTACATACTATGTGTCCATCAATAATACCTATAGACACGTTGGG  
CAAACAGTGCCTTCAAGTCTCAATGAAACAGTAAAAGATTCTCCCCCGCGATTTATGAAGATAGGTTAGAACACACGCCGGTACAATTACCCCGCGACG

CGTCGCGGGGTAATTGTACCGGCGTGTGTTCTAACCTATCTTCATAAAATCGCGGGGGAGAATCTTTACTGTTTCATIGAGACTTGAAGCGCACTGTTG  
TTGTGTATGCTTCTTCCCGGGCGGTAGTTCTACGGTAAACGAATCCTGGACCTTGAACGTGAAGCTGGAAGCCCGTCGGTTGCTTTGGTG  
CACCAAAGCAACCCGACGGGGTTCACGCTTACGTTACAGGAGGTCCAGGATTTCGTTTACCCTAGAACTACGCGCCCGGGAAGAAGCATACACA  
TCACGGTAGTCTGCCCGCGGTGCTGTGTCAGATTCAATCGAGCCATACACCACCGGGTCCGGATCGAACAGCAGGTT  
AACCTGCTTTCGATTCGGGACCCCGGGTGGTATGGCTCGATTGAATCTGCACAGCAACCCCGACCGGGGGCAGGACTACCGTGA  
TGTTTGTACAAACCGTCTGTTGAATATGCAAAAAGCAACGCAGGAGTGTTTTAAATCCCGCTCATACGCGCCGTAATA  
TATTCGCGGCGTGATGAGGCGGATTAAAGAACATCCCTGCGTTGCTTTTGCATGATTCAACAGGACCGTTTGTAAACAAACA  
TGACACAGCAACCCCGACCGGGGGCAGGACTACCGTGATCTGCAGTATCTGTGGGAATTAATCAAGACCACGAACCATGGACAGACTGCCTTTTCGAGCCACGGATAGAGGAA  
CAGAGG  
CCCTCTGTCTCTATCCGTGGCTCGAAAAGGAGCTCTGTCCATGGTTCTGTGGTCTTGATTAAATCCCACAGATACTGGACGATACGGTAGTCTGCCCGCGGTCCGGGGTGTCTG  
TGA  
CAGGGATGTTTTTAAATCCCGCTCATACGCGCCGTAATACTATATAGTTTAAATCAACAATTTTGTAGGCTCTACAATTTCCGGTGTGATACAGTTCGCAAGTTGATCATCAAGCC  
ATCCGATAAAGGTTGCTATGAACACGTGAAT  
TGGGAATTAATCAAGACCCAGAACCATGACAGACTGCCTTTTCGAGCCACGGATAGAGGAACAGAGGGAACCGGAGATTCCCGTGTACATGCAACCTTTACTCGGATGGCTTGATGAT  
CAACTTCGGAACGTATCAACCCGAAAT  
GGTACACAGACCGCTCCTTTGACATAAGTTTTCCTCGAATGGTTGACGGCGGCATGGCGTTCTGGACGCTACACGATCGAAGGCCCGCTCCGAGATACGGATTATATCGCCTAG  
CTAGGCGATATAAATCCGATATCCGGAGCGGCTTCGATGCGCTGTACGCTCCGAGAACGCGCATGCGCGCGTCAAACCATTCGAGGAAAACTATGTCAAAGGAGCGGTCTGTGTACC  
ATGTCGCAATAAACCTCCGAGCAAGTAAAGTAACTCCGATACCTGATAACGACAGGAGCATTTCCGCCACTGCTTGACCCAAGTTAAACGGGAAGGTGACAGGGGTCTGTTAATA  
ATTGGCAGATTAAGCC  
GGTTAATCGTGCCAATTATTAAGACGACCCCTGTACCCCTCCGTTTAACTTGGGTGACAGAGTGGCGGATAAATGCCTGTCTGTTATCCGGAATGGGTTATCATTTAGGTCTCGGAGG  
TTATTGTCGACAT  
CGCAACCCAGAAACAACACAGAGACTGTGGTGCCATCCATTGGAACATCGGACGTTTACTGTAAAATGTGTGACCTTAACTTTGAAGGAGAATGTCTTTTGTATTTCCAAAAGCAA  
ATTGGCGGAGAACAGGGGTCCGCATCTGTGCTGTAGCCATCGACGTACATCAAAACTTCATTAAAGTAGCAATAAACGATACAGCCCTAATGACTGGTAGACCGATACCATATCCGGC  
CCATATGACATTGGCTTTAT  
ATAAAGCAATGTCTATATGGCGCGGATATGGTATCGGCTACACGTCATTAGGGCGGTGTACGTTTATTGCTACTTAATGAAGTTTGTATGTACGTGATGGCTCAAGGACCAGATGCG  
GACCCCTGTTCTCGCAAT  
ACTATGCTAGAAATGACTAGCCTTTCCCGTGTCTGATAGAACCCCTACTCGCTAAAATCGCGTAAATTAACCTCTATTAAAAACAGCAGTGTCCATGGTTTTTAC  
GTAAAAACCATGGACAGTCTGTTTAAATAGAGAGTTAATTAACGCGATTITAGCGAGTGAGGGTCTATACGAGCAGGGGAAGGCTAGGTATTTCTAGCATAGT  
CCCCGAAACCCGTACGTCGCCGAAGTGTCCCGGAGGGCAACCATAACCCCTGTATTAATTCGGAAGCGCGGCGGTG  
CACCCGCGCCGCTTCCCATTTAATACAGGGGGTATGGTTGCCCTCCGGACACTTCGGGGACCGGTACCGGTTTCGGG  
CCAACCGGGTTTITAGGCACCCATTCCTCGACGATTCTAGCCAGGACGATTTCGCTAATCTAAATGCATGGGGAACATAGCGCAGTATATCTGTGGAAAAAAGCGCTGAAATCAAAAC  
TTTGCCATCCAACGATCTTGTAGTTGTAC  
TTCAACAGCCTGTACAACTACAGATCGTTGGATGGCAAAGTTTGAATTCAGCGCTTTTTCACAGATATACTGCGCTATGTITCCCCATGCAATTTAGATTAGGCAAAATCGCTCGCTAG  
AATGCGTCGAGGAATGGGGTGCTTAA  
CTAATCTAAATGCATGGGGAACATCGGCAGTATATCTGTGGAAAAAAGCGCTGAAATCAAACTTTCATCCAACGATCTTGTAGTTGTACAGGCTGTTTGAAGACGCTAGATATCCGG  
CCCGCGTCCCAATGTACAGTTGATCTGCG  
ATCTAGCCCGCTGGGACAGTCTCCCGCTTACCTCCGCGGTGACAGGATCTTATTGGGCAAATCCCTCAAGATACTGGACATGCAGATGCAACTGTCAATTGGGACGCGGGCGGATATCTA  
CCGTCTTCAACAGCCTGTACAACCTACA  
CTCAACCTTITAGCGCGCTTGGCTAATTTGGAAGATTGCGCGCGGATGGTTGACTGTTCATCATCGGAACATCGCACAAGTGGGATGATTACCTGCGCGGAACGCTGCATTAAGAGGAGTA  
TAGAGTTTGAAGATATAATTAATAGACAA  
TAAGACGATTTTTAAGTTTGTCTTATTAATATATCTTCAAACTCTATATCCTCTTTTAAATGCACGTTCCGCGCAGGTAATCATCCCACTTGTGCGATGTTCCGATGATGAACAGTCAACC  
ATCCGCGCGCAATCTTCCCAATTAGCCCAAGG  
GGTCAATTCATTATCCCAACTAGCCGAAGGCGCTCATAAGTGACGTTGTTTCTATTGACGCGGGAACATTTATTAAGTGGGAGGCAATAACAATTCTGCTAAAAAACGATTT  
GTTATTTTCAGAA  
TTCTGAAAAATAACAAATCGTTTTTTAGCAGAATTGTTATTGCTCCCACTTAATAAATGTTCCCGTGAATAGAAAAACACGCTACTTATGAGGCTCTTCCGGCGTAGGTGTGGAT  
AATGAAATGACC  
TTCACAATCTTCAATTGATTCCCAACACCCAACGCGAGATCGTATATGGGCCCGCGGGGTGGAATGTGGCGTTTTATAACACCCGCG  
CGCGGGTGTATAAACCGCCACATTCACCCCGCGCGGCCATATACGATCTCGCGTGGGTGTGGGGAATCAATGAAGATTGTGAA  
CTTCAATTGATTCCCCAACCCAACGCGAGATCGTATATGGGCCCGCGGGGTGGAATGTGGCGTTTATAACACCCCGCTTGGGTAAATTTAGACTCCACCCCATTAACGTTGGTTAT  
C  
GATAACCAACGTTAATGGGGTGGAGTCTAAATTACCAACGCGGGTGTATAAACCGCCACATTCACCCCGCGCGGCCATATACGATCTCGCGTGGGTGTGGGGAATCAAAATGA  
AG  
AGAGATAGATGGGACGTGGTTGCAAAACGTAGACGCGGAAGCCGGAATATAGGGTACGCTTTATCTTCAGGCTAGCACCGGATATGGACTGTCTCGGATAACCAACGTTAATGGGGTGGAGTC  
TAAATTACCCAACGCGGGTTGTATAAACG  
TAGATGGGACGCTGGTGTGCAAAACGTAGACGCGGAAGCCGGAATATAGGGTCACGTTTATCTTCAGGCTAGCACCGGATATGGACTTG  
CAAGTCCATATCCGGTGTAGCTGAAGATAAAACGTGACCCATAAATCCCGCTTCCGCTCTACGTTTGTGCAACCAACGCTCCCATCTA  
GGACTAAATGAGTTGAAGTAAAAGCCGTAGTCCATAATTCGGGTAAGTTTTCGGTTTTCGCAAGAAGCGCCTTGTCTGGGTTCCTATGTCCGCGCGCGGAC  
GTCCGCGCGGACATAGAAAACCCAAGCAAAAGGCGCTTCTTGAAAAAAGGAAACATTCGCGGAATATGGACTACGCGCTTTACTTCAACTCAATTAGTCC  
TGTCTAGAGGAGGTTTATCTGCCCGTAACAGGTCCCTCGTCGGGAAATCGAGAAACCCCTATCCGACCAAGTTCGCGGTATAAATGTGAGTGGCGGGG  
CCCCCGCACTGACAAATTAACCGGAATCTTGTCGATAGGGTGGTTCTCGAATTTCCGACGAGGACCTGTTACGCGGCGAGATAAAACCTCTCTAGGACA  
AATGTTGTATACACAACTCCGATGTTGCTTATGACAGATCGAGCAACTCTTAACCCATGGGCATCAAAAAACATTCATACCGTGACAGGCTATACAAACGACATACAACCTTAC  
AGGCTCTCCTATCTAC  
GTAGATAGGAGAAGCCTGTAAGGTTGTATGTTCCGTTGTATAGCCTGTACCGTATGAATGTTTGTGATGCCCATGGGTTAAGAGTTGCTCGATCTGTATAAGCAACATCCGATTGT  
GTGTGATCAAAACAT  
TTTTTGACATGTTTTTGTATCGCCGTTATACTCCGGTATACTGGAGTCTTCAGGAGCAAAATTCGGAAACAAAAGCAATACCGGCATCTTATCTGACATACGGACAC  
GTGTCGATGTGACAGATAAGATGCGCGTATTGCTTTTGTTCGGAATTTGCTCCTGAAGACTCCAGTATACCGGAGTATAACGCGGATCAAAACATGTTCAAAAA  
AGAAGCGGTACGGCTTGACATGCTGCTTGTGAAACCTGCGGTCAAAACATACAGTATCGTACTTGAGTTTCTGCGTGAACACCGGTTGCTCTAT  
ATAGAGACAAACCGGTTATTCACGCGCAAACTCAAGTAACGATGACTGTAATGTTTGACGCCAGGTTTCAAAAACCTGATGTGCAAGCCGTACCGCTCT  
CCACGCCAATGGCATGCCCAACAACTTCCCGGATGACCCGTGTATAAATCGCCGAATCGCAATTCGGTATGCCTTACACGCGAGAGCGGTGTCTGTGGAGCACCGTTAATGTAATAT  
GACGACAGCGCTATATCCACCAAGTGAAG  
GTCCGAAACCCCTCAAGAAATGTAATTCGTGTGCAATAAACCCTAGCATCGCGGTGTTTCTGCTGGGACTACAAGCAAGTGTATACAGTCCGGGTAAATTTTACAATATCACGCTCGCG  
AAGCTGCGTCAATGCA  
TGCAATTGACGGGACGCTTCGACAGCTGATATTGTAATAATTAACCCGACGCTGATAACACTTGCTTGTAGTCCCACGAGAAACAACCCGATGTCTGAGGTTATTGACACGAATTACA  
TCTGTGAGGTTTCGAC  
GTGCTGAACATGGTGTCTATAGAGACGCTGCACATGCCCATCCCGCAATTTAAAAAGATGTTTGTATTGCGGAAGTGTTTTTCTTAGGTA  
TACCTAAGAAAAACATCTCCGCAATACCAACATTTTAAAAATGTCGGATGTGGGACAGTGGCAGCTTATCTTCGCTAACCCTTCCATCTTATTTAAACGAC  
TGACCGGTTTTGACCGGTTATGTGACTGAGGGCTTGTATATATAGCATTCAAAAGCCACCAACAGTAACAAACGCGCGGTGAGAATATGACGCCCTAGCAATCCTGCTCATCAATAACAATAA  
CGTTGCTCCGGTAAAAGCCGAAGGGA  
GGGTTAAATAGATGGAAGGTTAGCGGAAGATAAACTCGCCAAGGTGTTATTATCCACAGCCGTGAACAATATGCTTTTAAAGAGATAGATGGGA  
TCCCATCTATCTTAAAAGCATATTGTCAGCGCTGTGGATAATAACACTGGCGAGTATATCTTCGCTAACCCTTCCATCTTATTTAAACGCA  
TGGCGAGTTTATCTTCGCTAATCTTCCATACITTTATTTAAACCCGCGTAGTCTTTAAACAGCGACAATAACCGCGCTTACTTCCATCGATAAAACCCGGAATGGTTCAATTGAAGAT  
TCCGGGTACAGTACATAGTTAACCCACAGATCG  
GTGCTCAATTATGACTGTACCCCGGAATCTCAATTGAACCATTCGGGTTTTATCGATGGAAAGTAAAGCGCGGTTATTGTGCTGGTTAAAGACTACGCGGTTAAATAAAGTATGGAAG  
GTTAGCGAAGATAAATCTCCCAAGATCG  
CCAGCATCGCGCACAAGAACTAAAACTCTGCTACCCAGATGACCCCGCAACATGTCTCCGTGCTATGGAATATATTGAAAGAGCTGTGTAATGCCGTTACGACACAACTTCTCTAA  
ATATACCTAGTATTACGTATACCACT  
CAATCTGTATCATCTTTTACTGCTACATAGTAAATACTAGGTATATTTAGGAAGTGTGTCTGACCGCAATTAACAAGCTCTTTCAATATATTCATGCACCGGAGGACATGTTTGCCGGG  
TCATCTGGGTAGCAGAGTTTTAGT  
CCAGGTATACGACCGCCCGCCGTAAGGAAATGGCCAACAAAGTAAGATATTTCAATTAATCTCTTTTTTGTACAGCGCGTAGTTAGGGCTGCATTACTATCGATCAGCACGCTCTCGT  
ACGAGACGTGCTGATCGATAGTAAATGCAGCCCTAATACCGCTGTACAAAAAAGGAGTAATTGGAATATCTTACTTGTGTGGCCATTTCTTACCGGGGGCGGTCGTATACCTGG  
ATCGCAAAATAAATGTTTTATATACGGCCTCGGAACCTGCTGCTTTTACAATGGTTATGAATCGACCCCTCATCATTAATGGAATTTAAGTTTAAATGGGGT  
ACCCCATTAACCTTAAATTTCCATTTAATGATGAGGGTGCATTCATAACCATTTGTAAGGAGCAGCAGGTTCCGAGTCCGATATAAAACATTTATTTGCGAT  
CCTTTTAAACTGCCGCAAGCGATCCAAATAGTGCCCTATGGTTAATAAACAACATAACATGCAATTCGGTATTCGTGCGGACACGCGCACTTGGGTTTTTAAAGGTAGT  
ACTACCTTAAAAAACGCAAGTGCCGTGTGCGACGAATACCGAATGCATGTTATGTTGTTTATTAACCATAGGGCACTATTGGATCGCTTTTGGCGAGTTTAAAGG  
CAGGTTCCGAGGGCGTATATAAGCTTTTATTTGCGATCTCCTATGCGCTCTCTCGGAATTACAGACAAACCCCTAAAAATTTTATTTGCCATCC  
GGATGGGCAATAAAAAATTTAAGGTTTGTGTTGTAATTCGGAGAGAGCGCATAGGAGATCGCAAAATAAATGTTTATATACGGCCTCGGAACCTG  
CATCGTACCGCTGATATGCCATCATATAAAGGCCATGGTAAAGCGCTCCGTCATATATTTCTCATATTTCTGGTTGTGCGGTGGCGGCTCCGCGATCGGGG  
CCCCGATGCGGAGATGCGCAACAGCAACACAGAAATATGAGAATATGACGGAGCGCTTACCATGGCTTATATGATGCGCATATCAGGCTACGCGTACGATG  
TGGGGTAGTTGGGGCTTCTTCATACGCGGGAATTTCCGGAACGATAAATGCCTGTAACGCGAGGATATAGCGCATCATAAACGACGCGCAATTTGTAC  
GTACAATGGGCGTGGTTATCGCTATACCTCGGTACAGGCAGTTATCGTTCGGAAATTCGCGTGTGAAGAAGCCCAACTACCCCA  
TTATTAATTTGGTGAAGCAGCATGATGCGGTGGGGCTTCTTCAATTAATAAATTCCAACCCGAGGAGCATTAATTCGTTGTGACGCGCGGCCCTACTTTCGGACCTCAACGTAAGAGTCTGT  
CGGATATGTTTTTATGACCCGACAC  
CATCACCGATGGTTGGGTGACGAAACCATATCCGACAGATACGACAGAGTACGCTAGGTTCCCTGGCGTGTGGGTCTAAAAAACATATCCGACAGACTCTACGTTTGAGTCCGAA  
GTAGGGCCGCGGTGCAACAGGATTTAGA  
TACATGGTAGGCAACGGGTTGGCGTATGTTGCTGTGTTGGTCCCGAAAAAGGAGGAGTGTGGTACCATTTTTGCCTAAACCCGCTAACATTGCGATCATITGCGTGGAAAT  
GACAAATGCTAG  
CTAGCATTTGTCAATTCACGCAATGATGCCAAATGTTAGGCGGTTTTTGGCAAAATGTTACCACTCCCTCCTTTTCTGGGAGCCAACCAACGCAACTATACGCCAACCCGTT  
GCCTACCATGTA  
ATATTTTAAAGGTATGGAGTTCGGAACCGCATCGGAACAGGAATCGGAACGTTATCTTTATTTGGAATGCAAGCTCGATACAATTGCGAAATGAATTTCTCTTTTAACTACAAAGCG  
TGTTTTTTGG  
CCAAAAAACACGCTTTGTAGTTAAAAGAGGAAATTCATTTGCAAAATGTTATCGAGCTTGCATTCCAATAAAGATAACGTTCCGATTTCTGTTCGATCGCGTTTCCGAACCTCATAC  
CTTAAAAATAT  
GTACCGACGGCTCATAGCCACGCGCGCGCGCGTGGGGAGAGGCCAGAGGCGCTCCCCGTGGCCATGGCTTCGCTACATGCGGAACGGGAGACGCTACGCTCCCGTAAACGG  
CGGTACCCGCC

GGGCGGTACCGCGTTACGGGAGCGTAGCGTCTCCGTTCCGCATGTAGGCGAAGCCATGGCCACGGGGAGGCCCTCTGGGCTCTCCCCACGCGGCCGCGGCGTGGCTATG  
AGCCGTCGGTAC  
CACGTAGAGCGGCAAGAATGTGATCGCTAATTTCTGCGGATTTTTCATATCGTTCCTAGAGGGTTTAGATTATTTTTAAGAACCTAGAGGAGACCGTACGCGACATGGCAACATACACT  
ATTTAGGCGCAGTTTATCCGCCGTA  
ATCTGGACCCGTCATTCCACCTCAGTGGTTTTACCACCATAAACTACAGACATACGGTGATGCGGCGGCAATGGCGTTTGAAAAACCAACGAACCGGCGGCACGAGCGATAG  
TTGAAGCATTGTTTATA  
TATAACAATGCTTCAACTATCGCTCGTCCGCCGGTTCGTTGGTTTTTCCAAACGCCATTGCCCGGCATACCGTATGTGTCTGTAGTGTATGGTGGTAAAACCACTGAGGTGAA  
TGACGGGTCCAGAT  
GGGTAAATTTGGATGCTAACTCTCCGGATGCGGCTCCTGAGGCTGTGTGGACGTCTTAAAGAACAGTGCGTTGGTAGAACCGGGTGTGTAGGTATA  
TAACCTACACAACACCCGGTTCTACCAACGCACTGTTCTTTAAGACGTCCACACAGCCTCAGGAGCCGCATCCGGAAGAGTTAGCATCCAAATTAACCC  
ATAAAATTTCTAACAACTCTGGAGTCTCCTAAATGATGTAACCTACACAACACCCGGTCTACCAACGCACTGTTCTTTAAGACGTCCACACAGCCTCAGGAGCCGCAT  
ATGCGGCTCCTGAGGCTGTGTGGACGTCTTAAAGAACAGTGCGTTGGTAGAACCGGGTGTGTGTAGGTTACATCATTGGAGACTCCAGAGTTGTTAGAATTTTAT  
CCGCACAGTGGGGTGGGATAGTCGGCCAGTTATATTCGTAATGGCAGCCGCTGTGTATCGACGCGCAATGGGACTCCACCTCGTGTGCGCCGACCACA  
TGTGGTCGGCGCACACGAGGTGGGAGTCCCATTCGCGCTCGATACACAAGCGGCTGCCATTACGAATATAACTGGCCGACTATCCCACCCCACTGTGCGG  
GTGTATTAAGCATTGTATAAAACACGCATGCGGGCTTGTGTTCTCATTCTAGGTTTTGTCTTAAATACACCCGCCATGAGCATCTCTGGACCCCAACGACGTTTATTTTATAGGTTAC  
ATGGGTCAGGCGGGTCTTCACTGG  
CAGGGCTGCGGCAAAACACCTCGCCCAGGTGGGTACGTCGCCGGCCTCCGGCCCGCGGCCCGCGGTCTCCGTCCCTCGGGAAGGAAGACGGG  
CCCGTCTTCTTCCGAGGGACGGAGACCGGGGCGCGGGCCGGAGGCCGGCGACGTACCCACCTGGGCGAGGGTGTGTTGCCGCCACGCCCTG  
CGTGGCATGGCTTCGCCTACATGCGGAACGGGAGACGCTACGCTCCCGTTAACGGCGGTACCCGCCGTCCCGGTGGCAACAGCTTTTGGTAGAACTGGTTCA  
TGAACCACTTCTACCAAAAGCTGTGCCACCGGGACGGGCGGGTACCGCGTTACGGGGAGCGTAGCGTCTCCGTTCCGCATGTAGGCGAAGCCATGGCCACG



TGAGCGGCCCGACACCGGGGAATTATCGGGGTTCTGGATCGCGGCAGGGAATAATGATTTCTGTCTCTGGCGCCCGGTTCCCCCGCAAGACGTTTGGTCTTACGAATCCTCGGAT  
CGGACCGCTGATGGATCGA  
TCGATCCATCAGCGGTGCCGATCCGAGGATTCGTAAGACCAAACGTCTTCGGGGGAACCGGGGCGCCAGAGACAGAAATCATTTTCCCTGCCGCGATCCAGAACCCCGATAATTC  
CCCCGGTGTCCGGGCGCTCA  
TGAGCGGCCCGACACCGGGGAATTATCGGGGTTCTGGATCGCGGCAGGGAATAATGATTTCTGTCTCTGGCGCCCGGTTCCCCCGCAAGACGTTTGGTCTTACGAATCCTCGGAT  
CGGACCGCTGATGGATCGA  
CCCAAAACCGGGGATTTCCGGCTATTTCCCGGGGGCCCTGCATACCCCGGTCCCGTCGGACCAGGCTCGAAGCGCTACTGTACCCCGGAAACCATGCCCGTCTGGTCGACGACCCATTGTT  
TCCACCGGCTGGCGCCCTCGCCTAAGC  
CCACGGGAGTGGAGGCGCTGCGACGGAGGTGCGCCTGGATGCGGCAGATCCAGACCCGGAGGATGTGAGGCTTCTGTATCATCTACGATCCGTTGCCCGGAGAGGACATCAAC  
GTTGATGTCTCTCCGGCAACGGATCTAGATGATCAGAAGCCTCACATCCTCCGGGTCTGGGATCTCCGCGATCCAGGCGCACCTCCGTCGACGCGCTCCACTCCGCTGGG  
TCCAATGTTTGATATCGGCCGTTATATTTACATACAAGTGACCAACGCTTGTATCTTCAAGGGCGACACGCTGAGCTTGAAGTAAACAGCAGTCTACGCTACTCTTATCCCATG  
CAAAATGATAA  
TTATCATTTTGCATGGGAATAAGGATAGACGTGAGACTGCTGTTAACTTGCAAGCTCACGTGGTCGCCCTTGAAGATCAAAAGCGTTGGTCACTTGTATGTAATAATAACGGCCGATA  
TCAAACATTGGA  
TGGTTACATGAGGACGTTGTTACGACAGAACTAAGTCCGTTGTTAAGGAGGGGATAGAAAAACAGTATATCCAACGGATATGTCCACGTTACCCGAAAAAGTCCC  
GGGACTTTTCGGGTAAACGTGGACATATCCGTTGGATATACGTGATTTTCTATCCCTCCTTAACAACGGACTTGTGTTCTGTGTAACAACGTCCTCATGTAAACCA  
GTTGTGCAATGGCGCCCTCAACATCACATCGGATTCTGGTTCGCAATTTTGATGCCCTTCTGTTTGTGATTGGCGGATAAAATGGATGTTTTTAATCTACGTCGCTTAACGCT  
TA  
TAAGCGTTAAGCGACGTAGAATTAATAAACATCCAATTTATCGCCCAATACAAAAACAAGAAGGGGCATACAAAATGCGACACCAGAATCCGATGTGATGTTGGAGGCCGCCAT  
TGCACAAC  
CCATCGAGACAGACAAACTCAGTCCATCTCGGTGAAAAAGCCGGGCGATGAGCAAGCGGTCATGCGCATGCATCGGGGACGGAGTAGTTC  
GAATCTACTCGTCCCCTGCATGCGCATGACCGCTTGCTCATCGCCCGGCTTTTACCAGAGATGGAGCTGAGTTGTCTGTCTCGATGG  
GTTCTAAACGATCATCCCGTGGACACAGAAAGAGAGCGCGCGCGCCGACGGCTAGGGTCGGGAGTCTGTGTGGCCGGGTTGTTGGAGAA  
CTTCTCCAACAACCCCGGCCACAGACTCCCGACCTCAGCCGTGCGCGCCCGCGCGCTCTCTTCTGTGTGTCACCGGATGATCGTTTACGAAC  
AAACACCGTATCGATCCCTGTCAAATCGAAGACGCGCTCTACAACGCTCCTGCAATGACCACGGGAGAAAGAAATGATCAGACACATGACGAATCGTACAGGTTGCGATTTTCCAAGA  
GAGACGCGCGCGAGAGCGTATTTCGAAAAG  
ACTCTTTTCAAAATACGCTCTCGCGGGCGCTCTCTTGGAAAAATCGCAACCTGTCCGGTTCGTCATGGGTCTGGTCACTTCTTCTCCCGTGGTCAGTGGGAGGCGTGTGGGACGCCGTCT  
CGATTTGACAGGATCGATACGGTG  
GTAGGTTCCGGTTCACCCGATAATCTTGTGTCTCGGGAAGCAAATTCGCTGAAGCAGACCACAGCCGTTAATAATAGCCCGGCTTAATGTTTCTCAAACATATAAAGTGGCACCCAGAT  
GAATTTACTGTTACAGAGAGACCACTGG  
CCAGTGGTCTCTGTACCAAGTAATTCATCTGGGTGGCAGCTTTATATGTTTGAGAAACATTAAGCCGGCTATTATTAACGGCTGTGGTCTGCTTACGGAATTTGCTTCCCGAGACACA  
AAGATTATCGGGTGAACCGGAACCTAC  
CACAGAAAGGACTCGCCCGGGCGGTGTTGCATCGTCGCGCACCTTTGGGCCAGCGAGTTTGTCTGTATCGAGACTGCGTTTGCCAACTGTACCCGGGCG  
CGCCCGGTACAGGTTGGCAAACGCGACTTCGATACGAGCAAAACTCGCTGGCCCAAAGGTGCGCGACGATGCAAAACAGCCCGCGGAGTCTTCTGTG  
TAAACGAACATGAAAAACCGCAGAACTACAGCCGTAACGGTTGAGTTGGCGTATTGGAAAAACTCCCATACACTTGTATAGGGCG  
CGCCCTACAAGTGTATGGGATTTTTTCCAATAACGCCAACTCAACCGTCAAGCTTCAAGTTCTCGGTGTTTCAATGTTTCGTTA  
TGGCAAAGTTTATGGCGGTGTCGTTGGTTCCAAGTCTCTCAGTCCATTTAGGGGCTTTATGCTTTTCTGGGTAGAAGGCGTTACTTTTGC  
GCAAAAGTAAACGCTTCTACCCGAGAAAAGCAATAAAGCCCTAAATGAGCTAGAGAAGCCAGTTGGAACCAACGACACCGCCCATAAACTTTGCCA  
TAATGTTTTTAAACCTGCCCTCGGTGTATGACGCCATCAGCGAGCTTAAATCTGGTTACGTTCAATTCAC  
GTGGAAATTAGACGTTAAACGAATTTAAGCTCGCTGATGGCGTACATACACCGAGGGGCGAGTTTAAAAACATTA  
GTACGTTGGGTCTTCACTGAGTAATTAGAGTTAACAGAAATTAAGCTCGCTGATGGCGTACATACACCGAGGGGCGAGTTTAAAAACATTATAAGAATCAAGCATGGTGTCCGAATTTCCG  
TATGTTTGGTCAAACGATCTGTTCTTTC  
CCCTGATGTACCGGATATCAAACGCTCAATCCCGGTTGAAGCGTTACGAACACTTCAAACCAAGCGGTAGTCAATCCATGGGAGCAAAGACGATACGTTTGACCAAAACATACGAAATTCG  
CGAGCACCATGCTTGATTTCTATAATGTT  
ACAACAGAGTTTGCCAAAAGCGTGGCTTCAAACCGGTTACCTCCCGCCCTCGCATACGAATCTTGGTTATGCTGTGATTCTTAAGATCTTCGATCACGTCGCTACATCCAAACCC  
GGGGTTGGATGTGAGCGACGTGATCGAAGATCTTAGAATACAAGCAATACCAAGATTCTGATGCGAGGGCGGGAGGTAACCGGTTTGAAGCCACGCTTTTGGCAAACCTCTGTTGT  
CAACTCGTTCGGAACCTCTTAACGTTTACTTCCATAATGCACACCTAACCGTGTATGGTGTATGCTTACACTACAAGAGTTAATGGGAGATATGGCTGAACGAACGACGCGCCATTTTAG  
TATCAAGCGCCCGGATCGGGAGCGCG  
CTGCATGCAATCTAGAGGTGCGAGCATCTGGAATGTTATATATGGGTGACCGGTGACGCGGCACATAGAGGCTATAATGTTTGATCACACAAATCCGAT  
ATCCGATTGTGTGATGCAAAACTATAGCTCTTATGTGCGGCTCAGGTCACCCAGATATAACATTCAGATGCTCGACCTTAGGATTGCGACG  
AACTGAGGAATGACACCCAAACAGACAAAAATATAGAAGATCATAGTCACTGTTAAGCGTTGAAGTGGCAAGCGCGGACCTTCTTCCAATGCGCGCCCTACACGCGGTGGTGCAT  
TAACATTTCAAGTCCCGTCTCATATTG  
CAATATGAACGGGGACTTGAATGTAAATGACCAACCCGCGTGTAAAGGGCGCATTTGGAAGAAAGTCCGCCCTTGGCGAGTTCAACGTTAAACAGTGACTATGATCTTCTATATTTT  
GTCTGTTTGGGTGTCAATCTCAGTT  
GGGGCTCGGGGACGCCGACTTTGTGGACGAGGGCGGCACATAGCCACCGCGCAGCAAAACCGATGGGGCCTGGGTGCGCGCTTCGACCGCTCTCCTTCCGAGGGACGAGACCGG  
GGGCG  
CGGCCCCCGTCTCCGTCCCTCGGAAGGAAGACGGGTGCAAGCGCGCACCCAGGCCCATCGGTTTGTCTGCGCGGTGGCTATGTGCCGCTCGTCCAAAGTCGGCTGCCCG  
AGCCC  
TGATGGTACGGGCTCGGATACCCGCTCTTGGCCTTGAAACCCACATGATCGTCTGCAACCCGGGCGTCCGCGACGG  
CCCGTCGGGACGCGCGGTGTCAGACGATCATGTGTTTCCAAGGCAAGAGCGGATTCGGACCCCTGACCATCA  
TTGTGAGGAGGCTCTGCTCTCGACTGGCTGGGACTTGCCTGCGGAGATTCGTAAGAAAGTATCCGCGTGACACAGACTCCCGACCCCTACGCGTCGGCGCGCGCGCTC  
TCTTCTGT  
ACAGAAAGAGAGCGCGCGCGGCACGGCTGAGGGTGGGAGTCTGTGTGCCACCGGATGATCGTTAGCAACTCCGCGCAAGCGCAAGTCCAGCCAGTCGAGAGCAGAAGC  
CTCTCGACAA  
CACACAGGGCCCGAGGTGATGGTCACGGGCTCGGATACCCGCTCTTGGCCTTGAAACCCACA  
TGTGTTTCCAAGGCCAAGAGCGGGTATCCGAGCCCGTGACCATCACTCGGCGCTGTGGTG  
TTACGAATCCGCGCAAGGCTACGATCCAGCGAGTGCAGAGCAAGCCTCTCTCGACAAGATTAGGAGACACCCGTCGCGGACGCCCGGGTTGACAGCATATGTGTTTCCA  
GGCCAAGAGGCGGT  
ACCCGCTCTTGGCCTTGAAACCCACATGATCGTCTGCAACCCGGGCTCGCGGAGGGTGTCTCCCTAATCTTGTGAGGAGGCTTCTGCTCTGACTGCTGGACTTGCCTTGC  
GCGGAGTCTGTA  
CATCAATGCACTTGGCCCCGCATGCCGAAGCATGCTACAATAGCGCTATCGGAACTGTCCCGGGATCGTGGCCGCGGATAAACGGGGCGGTAATTTTGAAGTTTATAACCCATTAAT  
ACCATATATGGACATCCATAGGGGGGT  
GCTGTCAATTGTCTGTCTAAGAGAACGATACAGGAAGCTACGCGGTTAGCGCTATGTCTGAGATCGTGTATAATGACAAAAATTG  
CAATTTGTGCAATTTATACAGATCTCAGACATAGCGCTAACGCCGTAGCTTCTGTATCGGTTCTCTTAGACAGGACAATGACAC  
CAATGGATGCTGACGACACACCCCAACCTCCAATATCTCAACTGCAGGACCTTGGCTTCCACCCACAATACCGACGGACATGAACCAATGAACCCGACGGCATGACGAA  
G  
CTTGCTGATCGGCTGCGGTTGATTTGGTTCATGTCGCTCGGTATTGTGTGGGAACGCAAGAGTCTCGAGCTGGAGATATTGGAGGTGGGGGTGTGTGCTCAGCATCCATTG  
CTTCCGTCAGGACATTTGTACCGAGTTGCAATGCTGTTAGGGCGTTCGAAGAAGAACTGTCAGTTGGACATTCAGCGGTTGACTGGATGATCAACAGCTCGCAATATATTGA  
CTCCATCCACTAAGTTGGGT  
ACGCACACTTGTGGATGGGAGTCAATAATATTGCGAGCTGGGTACATCCAGTCAACCCGCTGAATGTCCAACGTACCAAGTTCTTCTTCCAGACGCCCTAACAGCAATGCAAACTG  
CGTGACAATGCTCTGAACGTAAG  
CACTACCACTAGTGTGCTGCTTGTCTAGAATATACGGCGATAGCCATTTTTTACCGTTCACGACGAGGGTTTATGTGCACAAAAATCCCGTAGAGCGTTTTTCGATGATGTGGATGG  
GAGCTGAAGAGTCTGATACAATTATA  
CAGTTATAATTGTATACGACTCTTCCAGTCCCATCCACATCATCGAAAAACGCTCATAGCGGGAATTTGTGTGCACATAAAACCCCTCGTGTGAACCGTAAAAAATGGCTATCGCGTATA  
TCTAGACAAAACGCGACGACTGTGT  
CTTAGCTATTAAAGCAAGACAACTCTGCTTCCGCGGAAGCCCGTTCGCTGCGCGTGTATTAATGGTTTTAATTGTACGTGATAATTCATGAACTCTCGTCTGGATAAGTAACCTGC  
GGTTTGAGCTTCCCGACTAC  
GTAGTCGGGAAGCTCAAAACCGAGGTTACTTATCCAGACGAGAGTTCGATGAATATCACGTACAATTAACCATTAATACACGCGCAACGCAACGGGCTTCCGCGGAAGCAGA  
GTTGCTTGTCTTAAATACGCTAAG  
CGCAAAAAATGTTACATCCCTACCCATAGCCCGCGTGGTATCAATACATGACAGTGTATGTGCAATATGAACGGGACTTGAATGTTAATGCAACCAACCGCGTGAAGTGGCGATTGGA  
AGAAAGTCGCGCGCTTGGCGAGTTCAAC  
CCAGCAATGTGAACCGTACCCCAAGGCCATATCCCGCATCTCTGGTATACTTGGCAGGATAATTACCGGTTTGCAACGTAAAACTGACATAACGTTGACATGGAGGTA  
TACCTCAATGTCACAGGTTATGTGAGTTTACGTTGCAAAACGGTGAATTTCTCTGCAAGTATACAGAGATCGGGGATATGGGCTTGGGGTACCGTTCAACATTGCTGG  
ATGCGACTTTCGACGGTGACAGACTTGTGCGTCTAATGCACTGCGTCGTAACAAACCGCTAGTTATTCGGGACAATATCGAACCGCGCGGCAAGTGTGGTCTAGGACCCCC  
GATGATTCAGACGACTGTTGG  
CCCAACGAGTCTGTAATCTCGGGGCTCTACGACCACACTTCGCCGCGCGGTCGATATTGTCCGGAATAACTAGCGGTTGTTTTACGACGCACTGCATTAGAGCGCAAAAGT  
CTGTACCGCTCGGAACGATCCAT  
ATGATGGTACGCTTACCTTTTCAATAACCCAGAATTTATCTCTGTATTGCATAAGATTTTCGGCTAGGTCCACGGAGGGAATGGGCTGTTCTCGGGGATAGATGGTCTCAATCCC  
ACAAAACGGAAGTTCACTCTATAG  
CTATAGAGATGAACCTTCCGTTTGTGGGATTGGAGACCATCTATCCCGGAGAACAGCCCATCCCTCCGTGGACCTAGCCGAAAACTTATGCAATACAGGAATGAAATTCGGGTTT  
GGATTGGAAAAGCGTAGCCCATGAT  
ATGTGATTAGAGGTATTACTGTTAGGGCAGGTGCACTCCCACTGTTTGTGAATCTACGCAACTATTGTCACACGAATTAACCGGATATGAGGCTGTTCGCACAGCAGCCACAAATTTATG  
ATAGAGTTTGGCGATTGTTATAGGA  
TTCCTTATAAACAATCGGCAACTCTATCAAAAAATTTGGTGTGTCGCAACAGCCTCATATCCGGTTAATTCGTGTGCAATAGTTCGCTAGGATTACAAAACAGTTGGGAGGTGCACTC  
GGCTAACAGTAATACCTCTAAATCACA  
ATAACAGCTCATCTCGCGGTCGGTTTATATGTTGAGTCATTTTATAGACGTAGCCGTAGCCTTGTGATGGGAATTTGTGGCGCGGAAATTTATGTGACAGGTTTTACTTTTCGTA  
TGTATCCCGTACCCGCTCGG  
CCCGAGCGGTTACGGGATACATACGAAAAGTAAACCTGCACATAGAAATTCGCGCGCAAAATACCCATCACAAGGCTACGGCTACGCTATGAAAAAGACTCAACATATG  
AAACGAGCCGAGGATGACCTGTTAT  
AATACGCGGTTTGTAAAGGGGTGTTATCAACGACATACATTAGAGTGTAAACACCATAAACCTCCCTCATATAAAACCGACGCGTTGAGTGTAAATAGGACCTTTGGAA  
AAAATGCGTCG  
CGACGCAATTTTCCAAGGTCCTATTGACACTCAACGGCTCGGTTTTTATATGAGGGAGTTTTATGGTTGTTAAACACTCTAATGTATGCTGTGATAACAACCCCTTTACAAAAAC

CCGCGTATT  
GCCGTAAAAATTACATCATCCGGGTCTTCGGGTATGGAGGCCGTTACTTTGGACTCGGGGGCTTTGGTAAAGCAGAAGGCTTTATCGGCAGAAGT  
ACTTCTGCCGATAAAGCCTTCIGCTTTACCAAAGCCCCGAGTCCAAAGTAACGGCTCCATACCCGAAGACCCGGATGATGTAATTTTACGGC  
CATCGGTTCCCTTCCGGCTTTTACCCGGAGCAAACGTTATGTATTGATGAAGCAGGATTGCTAGGGCGTCATATCTCACGGCCGTGTTTACTGTTGGTGGCTTTGAATGCTATATATCAA  
ATCCCTCAGTACATAAACGGTCGAAA  
TGATCCGGTAAAGTCCAGTGAAGAACCCGCTGACCCCATGTAACCTATATAAAATAAACGTCGTTGGGGTCCAGAGATGCTCATGGCGGGTGTATTTAAGACAAAACCTAGAAATGAGAA  
CAGCAAGCCCGCATCGGTGTTTTATACA  
CCTCCGACGCTTCGGATAATACCTGCACCATATGCATGAGCACCGTTTCGGATCTCGGAAAAACCATGCCGTGTTTGCACGACTTCTGCTTTGTATTTCGGGCATGGACCTCCACC  
AGCGTCAGTC  
CACTGGACCGCTGTTGGAGGTCCATGCCGAATACAAACAAAGCAGAAGTCGTGCAAAACACGGCATGGTTTTTCCGAGATCGGAAACGGTGCTCATGCATATGGTGCAGGTATTATC  
CGAAGCGTCGGAGG  
CTTTTTCTGTGTTTACCGGGGATTAAACCGGGAAGCGCAAGGGGTGCTAAGCGCCGTTTATTTTCATACCGGCAGAGACGTTAAACGATGCTTAACAATAGACCTGACATCTGAGTCTG  
ATTCCGGCATGTAAGGG  
CCCTTACATGCCGAATCAGACTCAGATGTCAGGTCTATTGTAAAGCATCGTTTAAAGTCTCTGCCGGTATGAAATAAACGGCGCTTAGCACCCCTTTCGCTTCCCGGTTAATCCCCG  
GTAACACAGAAAAAAG  
CCCTGGGCCCCCTTCAATCGTCGGCTAGAGAGCCACAGCAGAGTCAACCAAGTACTCTCAACAGGATTCTATACAACCACCGACCCGAGACTCGAGCCCTGGTG  
CACCAGGGCTCGAGTCTCGGGTCGGTGGTTGTATAGAATCCTGTTGAGAGTCACTTGGTGACTCTGCTGTGGGCTCTCTAGCCGACGATTGAAGGGGCCAGGG  
CCTGTACGGGAGACGCAGCGCCCGCCATCCAGCATATATGTTTAAACATACAACATGCTTTCAAGACGTGGTGGATGTGGATTGCGCGGAAAAATACTAAAGAGGATCAGTTGGCCGAA  
ATCAGTTACCGTTTTCAAGGTAAGAAGGA  
CACATATGAAACTCAGCCCTCTTGGTTGAGGAGTTACTCGGGCGTAGGGTTTCTGTTTTTTCATCCCTTTCAGGTGACCAAAAACGTGGCGTAGGTAGACGTACCATCGGAGCCGCGCA  
TGTTCCAAATGTACACACCCAAGTATT  
GAACCGTGTTCGTCGCTCCCTCCAACACCGTCTCCGCGGCCCAAAAACCGGGCGGCCACATTACTCTGGGAATCGGGGGG  
CCCCCGATTCCAGAGTAATGTGGCCGCCCGTTTTGGGGCCCGGAGACGGTGTGGAGGGGAGCGACGGAACACGGTTC  
TACCCCGGTCCCGTCGGACCAAGGCTCGCAAGGCGTACTGTACCCCGAAACCATCGCCCGTCTGGTCGACGACCCATTGTTTCCACGGCCTGGCGCCCTGCGCTAAGCTTTG  
CAAAGCTTAGCGCAGGGGCCAGGCCGTGGGAAACAATGGTCTGTCGACCAGACGGGCGATGGTTTCGGGGGTACAGTACGCCTTGGCAGCCTGGTCCGACGGGACCGGGGTA  
GTCTCCGCGGCCCAAAAACCGGGCGGCCACATTACTCTGGGAATCGGGGGGAGGGCATTCGAGCCTCGTCCCGGACGCATACAGCGCCACCGACCGGCCACG  
CGTGGCCGGTCGGTGGTGGCGCTGTATGCGTCGGCGGACGAGGCTCGGAATGCCCTCCCCCGATTCCAGAGTAATGTGGCCGCCCGGTTTTGGGGCCGCGGAGAC  
TCGATCCATCAGCGGTCCCGATCCGGGATTCTGAAGACAAACGTCCTTGGGGGGAACCGGGGCGCCAGAGACAGAAATCATTTTCCCTGCCGCGATCCAGAACCCCGATAATTC  
CCCCGTTGTCGGGGCCGCTCA  
CTGGAGAACTACTCCGTCCCGCATGCATGCGCATGACCCGCTTGCTCATCGCCCGGCTTTTTACCCGAGATGGACTGAGTTTGTCTGTCTCGATGGACCACCGACGGCAACCTGGT  
GAATTTCTCTCGTCGTTT  
AAACGACGAGAGGAAATTCACCAAGTTTGCCGTCGGTGGTCCATCGAGACAGACAAACTCAGTCCATCTCGGGTAAAAAGCCGGGCGATGAGCAAGCGGGTTCATGCGCATGCATC  
GGGGACGGAGTAGTTCTCCAG  
GAGGAGCGATCGGCTCTGTGGTTCTCGCGCGCCGCTCCGAGAATCGGGTGTGGAAGACCTCGGCAGCGGGATTACAGGCGAGCCCATAGATCC

GGATCTAATGGGCTCGCTGTAATCCCCTGGCCGAGGCTCTCCACACCCGATTCTCGGAGGCCGCGCGGAGAACCAACAGGAGCCGATCGCTCCCTC  
CGCGCGCGGGCTCGTTACGAGGGCTCAACTGAAACCCGTCGCCGCTTACGTCGGCGGAGTTGGGAGATCCGGCTAGACAGTACCGCGCGCTGATTAACCTGATCTACTGT  
ACAGTAGACTAGGTTAATCATGACGCGGGTACTGTCTAGCCGGATCTCCCACTCCGGCAGCTAAAGCGGCACGGGTTCAGTTGAGGCTCGTAACGAGCCGCGCCGC  
TTCGGATTCGACGCGGAATCATCGGACGGGGAAGACTTTATAGTGGAGAAGAATCAGAGGAGAGCACCGGATTCTTGTGAACACAGACGGGT  
ACCCCGTCTGGTTCACAAGAATCGGTCTCTCTGATTCTTCTTCCACTATAAAGTCTTCCCGTCCGATGATTCGCGCTCGGAATCCCGAA  
TTCTCCAAAGCCCTATTGCTCTCTGTAAGTTAGCCCGCGCAGCTGTCTGATGTCTGCTCTAAGTTCACTTAACGTTACACTTTCGGTTATAAAC  
GTTTATAACCCGAAAGTGAACGTTAAGTGAACATGAGCAGACATCAGACAGGCTGCCGGGGCTAAACTCAGAGAAGCAAAATAGGCTTTGGAGGAA  
CGATGAGGACTCTTTCCCTCGGTGCTGAGATGATCCATTCTCGCAATTTATGTCGGGTTATGCGCCCAAGGCCCAAACTTCGACACAATGATTTTATCCCAACGGAGCCA  
CTATTTAAGTCTCC  
GTTAGACTTAAATAGTGGTCCGTGGGTAAAAATCAGTTGTGTGAGGTTTGGGGGGCTTGGGGCGCATAACCGGCAATAATTTGCGAGTAAAAATGGATCATCGGGACACGAGGG  
GAAAGAGTCTCATCG  
TTAAAGAAGGTGCTTCTATTACATTACCAAGCGAAGGTTTATTGAATCGGGCTATAGAGTATTTTACAACCTTCGATCATAAACGATTATAG  
TCCTTTATACTATCTACGGAAGTTGCGTACGTGTCCCGGATGCCAACATATCCCCGCTTCTCTTTTAAATGTTGTCCATGCATCGTCCACGTAACCTCACCGGGTCTATTCTGTG  
CAAAGTGCAAAAGGCCACGGAGCGCAAACTTCCAACACAGATCCGATCAATAACGGTTCCTTTGATGGCGTCTTGTAGCCGCTGGACAAGGGCGATTACGGGAAAGAAAAACA  
ATTC  
GAATTGTTTTTCTTCCCGTAAATCGCCCTTGTCCAGGCGGCTCAAGGACGCCATCAAAGGAACCGTTATTGATCGGATCTGTGTGGAAGTTTGGCTCCGTGGCCCTTTGCACCTTG  
CTTGAGTTAAACAATGTTTACGGCCGCTTTATATAGCTAAAGGACGTCCCGATTATTTCTGTATGCGGTGTTTACGACGGGGAGTCATCAATACCTCCAGAAG  
CTTCTCGGAGGTATGATGACTCCCTGCTGAAACACGCATACAGGAAATAATCGGGACGCTCTTGTAGCTAATAAAACGGGCGCTAAACATTTGTAACTCCAGG  
CGAGGAAAGTCCAAAAGTCTATCAAGGGAATTTGATCTGGCTTCAACTTCTCAATGATGCAATTCACCGACGTGCCGCTCTATATGTTCCGGGGTTCGGC  
CAAGCTCATATTTAATCATTTCTCTGGGCTTCTCGAAATTTATCGGGATCAAAACCGCTATTACCGACGGTTCAGTGTTTGTGAGTCCGCAATTTCTTC  
GAAGAATTTGGGACTCACAAACACTGAACCGTCGGTAATAGCGGTGTTGATCCCGATAAATTCGAGAAGCCCAAGGAAATGATTAATATATGACGTTAG  
TGAGCAATTCCTCGCCGCTCTATCTCCAAGAATTGTCGTGAAACACTAATCATTCACCACAAAAACACCCGACTCGAAATACCAGATCCCGACGAAGCGTGCCAGTTGAGT  
TGCGTG  
CACGCAACTCAACTGGCACGCTCTGCGGATCTGGTATTCGAGTCGGGTGTTTTTGGTGGAATGATTAGTGTTTTACCGACCAATCTTGGAGATAGAGACGGGCGAGGGAATT  
GCTCA  
GTATCTCTCTGCTGGTGCCAGCTACAAAATCGCGAACCGCCCTTGGAGCGGACTATTCCAATTAACCAAGTGCTTACGAGACACCATTTGGATCAACGTGTTAAAGCTCGTATTCT  
CGCGCAGCTTATCTCGGTTTCTAATTG  
TCCAGTCTCGGACAATTAGAAAGGAGATAACGTCGCGGAGAATACGAGCTTTAACCGTTGATCCAAAATGGTGCTGCTAAAGCACTTGGGTTAATTGGAATAGTCCGCTCCAAAGGG  
CGCGTTCGGGATTGTGAGTCGGCACCA  
CCAGAGGGCGCGGTTGTACACAAGCTAGTTGAGTGTATGCAAAATGTTGCTATTATGGATTATGATAGGACGCGTCTTTATTATAATTAT  
ATAATTATAATAAGACGCGTCTATCATAATCCATAATAGCAACATTTTGCATACACTCAACTAGGCTTGTGACAACCGCGCGCCCTCTG  
CTTACTGCTGCTGGTGCCGCTTGTGCGGTTTTTCCGAGGAACCTCCCACTCAACTACAGGAACTACTGTCCGGAAGG  
CCCTTCGGACAGTAGTTTCTGTGAGTTGAGTTGGGAGGTTCTCGGGAACCAAGGCAACAATGGCGCACCCAGCAGCAGTAAG  
CAITTCCTAAGGCTGAGGAAGCTCGGCATAATTGTGCGCAGGCTGGATATCCCACTCTCATTGCGTTCGGATTCTTGTATTGTCCCAACAATATGACCAACCGCATCAGCAAGATCGT  
TTAAACGCCATACCCCAAATTTGTCAT  
CCAAAGGTTGAACGGGATGAACAATTTGGGTATGGCGTTTAAACGATCTTGCTGATGCGGTGGTTCATATTGTTGGGACAATAACAAGGAATCCGAACGCAAAATGAGAGTGGGAATATCCAG  
CTCGGCACAATTATGGCCGATGCTTCT  
TGCGGTTTCTGACACGCGACGTTAATTACAGCGGCTCATAATCAAGCTCGCGCGGATGGTGCGGTAATTGTCTCCGCCAAGTCTGCTAATAGATGATACCATGAACAACGTATCAAAAT  
GGTACATAGTCTGCTTTGGTTTTCTCA  
TAGCCAGCAACACAGCTGTTCAGACCGGATTTTACAGAAAATAGCGTGTATGCAAAATGAAAATTTCCGATTGGGCACGCGGGCTGTATTAGAAAAACCAAGACGACTATGTACCAATTGAT  
ACGTTGTTCATGGTATCATCTATTGACGA  
GTAAAGTGGCCAGGGCAGTGCCATGGAGACAACGCCAGGTGTCTGCGTTACCCAGTGGTTCAAGGGGCCAGGCGTCTAACGCGACGCCGAGGAC  
GTCTCGGCTGGTTAGACGCGCTGGCCCTTTGAACCACTGGGTAACGCGACACACTTGGCGTTGTCTCCATGGCACTGCCCTGGCCACTTTAC  
CATAAATATCTGTAATGGTATATTTCCAGCAGGGACCCAAAAAACTTATAAATCGATGTGGAATAATACATGACATTTGATACCATCGCACGTAAACACTCCGAAAACTTATGAGCCG  
CGGCTCATAAAGTTTTCGGAGTTTACGTGCGATGGTACAATGCTATGTTTCCACATCGATTATAAAGTTTTTTGGGTCCCTGCTGGAATATACCATTCAGGATAAATTTATG  
CCATTGTATGATCTAACGCTTCCACCTCGGGTGTCTGTTGCTGATCGGTGAGACTTTTTCAAGACGCGGCCCTTCTTTGAGTCTCCATGTCTCCCAACACCGGGGAGAGCAACGCC  
CGGCTCTATG  
CATAGACGGCGGCTGTCTCTCCCGGTGTTGGGAGACATGGGACCTCAAAGAAAGGGCGCGGTCTGAAAAAGTCTCACCGTACGACACCACGACACCCGAGGTGGAAGCGTTA  
GATATCAAAATGG  
AGTTGATACCAACCAAAACCTGAGTGTGATGGGGAACGTGTTGAGTTCGACCGGCAAGTCGCCAATTAACTGTAAGCGACGTTGAAATTTGACTGCATGTCTGGATAAT  
ATTATCGCAGTTCAGCTCAATTTCAACCGTCTGCTTAACGTTAATTGGCAGTTCGCGGTGCAACTCGAACCGTTCCTCATCACTCCAGGTTTTGGTTGGTATCAACT  
TACAAAATGACAGTGTGTTCCACCGCGTCCGAGTTGTAGTTTATAAGAAATTAAGTTATATATACATTTCTAGAACCAACCAAGCGGAGATTAAACCGT  
TTC  
GAAACGGTTAATCTCGCGTTTGTATGTTCTGAGAAAATGATATATAATGCTTATTAATACAATTATAATTTCTTAAAACTAACAACTGGCACGCGGGTGAACACACTGTCAATTTTG  
TA  
CTCCCGTGTATCCATTAATTAACCGGAGCTTCCGAAAGCAGTCAACCCATCCGAGTGAATCTTAAACCTGACCCGTGGCGTCTGTTACACAAGTTATACCGCCACTGGCGTTGGA  
AACAACTG  
CACGTTGTTTCCAACGCCAGTGGCGGTATAACTTGTGTAACGACGCCAACGGGTACAGTTTAAAGATTCACTCGGATGGGTGACTGCTTTCGGAAGCTCCCGTTTAAATATGGATA  
CAACGGGAG  
CTGCCAGCGCTCTTACTGCGCTTTTGGCTATTAGTGTATTATGCGAAAGGAAGAGTGGCGGATGGTTTAAATGGAACCGCAGCTGCAATTTTGGCGCGGTGTAAC  
GTTCAACCGCGCAACAATTTGACGTGCGGTTCATTTAAACCATCCCGCACTCTCTCTTTCGCCATAATACACTAATACGCAAAAGCGCAGTAAGAGCGCTGGCAG  
TTTTAGATAAAGCCTTTACCGCGCTTCCAAAGCCTCGCCGGCGTTGGAATAAGACATCCATCCCTACCGCGCTCGTGTTATGCGTTGGGAAATAGAACACCACTCCCGGTAG  
CCTACCCGGACTGGTGTCTATTTCCAAACGCATAAACAGCGAGCGCGTGAGGGATGGATGTCTTATTCAAACGCCCGCGGAGGCTTTGGAGACGGCGGTAAAGGCTTTATCTGAA  
AA  
GTCTTATTCAAACGCCCGCGAGGCTTTGGAGACGGCGGTAAAGGCTTTATCTGAAAAGACCGACAGCCTAACATCGCCGCTTTTACAAAGTACCGAAAGACACAGTGTCTGCTTG  
GAT  
ATCCAAGCAGAACACTGTGTCTTTCGGTACTTTGTAACCGCGCATGTTAGGCTGTCTGCTTTTCAGATAAAGCCTTACCGCCGTCTCCAAAGCCTCGCCGGCGGTGGAATAAG  
AC  
CTGGCGCAAGAACCTGAGCATAATACTTTGTTGGGTTTACCCCATGTGCTAAAATACTCTGCGCCACGCGCCGGGAAACCATATGTTGGTGTGTTCTTAACACAACCCAACCTG  
TG  
CACAGTTGGGTTGTGTTAGAGACCAGCACCCATATGTGGTTTCCCGGGCGGTGGCGCAGAGTATTTAGCACATGGGGGTAAACCCACAAGTATTATGTCTAGGTTCTTGCCGCCA  
G  
GCTAGTATCAGAGCGCCCGGATCGGTTTCAGATAGACCGGTTCTCCAGATCGAGTGCATGTCTGGACAATAACCTCCGAGACCTAAATGATA  
TATCATTTAGGTTCTCGGAGTTATGTTCCGACATGCATGCTGGAACCGGCTATGTGCAACCCGATCGGGCGGCTCTGATACCTAGC  
TTGCTTTTGGATAACAAAGCAATTTCTCCATCAAGTTAAGGTACACACTTTTACAGTAAACGCTCGGATGTTTCCAATGGATGGCACACAGTCTGTGTTGTTGTTCTGGGTGGC  
TATGACACACACGAAATAAAAAACGATTAATCAATTTGCTATGATCGTACACCGCACCGGTTTATGCTATGCTGCGGGGCGGTATGA  
TCATACCGCCCCCAGCAGCATGAACTGGTGGGTGTTAGACGATCATAGCAAAATTTGATAACTGTTTTTATTTTCTGTTGTTGTCATA  
ATAGTCACTGTTAAGCTTGAAGTGAAGCGGCGACTTTCTTCAATGCCGCCCTTACACGCGGTGGTGCAATTAACATTCCAAGTCCCGCTCATATTGCAACATAAACAAGTGTCTGATTG  
ATACCACGCGCGCTATGGTAGGGAT  
GTCAGCTCTGTGGTCCGATTTAACGTATACAGTGGTGTATATATCGTTCACATAAAAAATTGAAGTTATTATTACCGCTTTTAACTTCCCATCAAAACCCCGTCTGCTCCGCGCAAGAT  
TA  
TAATCTTTCGCGGAGCGACGGGGTTTATGTTGGAAGTTTAAAGCGGTAATAATAAATTTCAATTTTTATGTGAACGATATATAGCACCACTGTATACGTTAAATCGGACCACAGAGCT  
GAC  
CCGCCGTGTATCAATACATGACAGTGTATTGTGCAATATGAACGGGGACTTGAATGTTAATGCACCAACCGCGTGTAAAGGCGGCAATTGGAAGAAAGTCGCCGCTTTCGCGAGTTCAACG  
TTAAACAGTACTATGATCTTCTATATT  
CCCTCGGTCACTGAGCTTCACTGGTGGATATAGCGCTGTCTCATATTACATTAACGGTGCTCCACCAGACACGCTCTCGCTGTTAGAGGCATACCGAATGCGATTTCGCGGAGTTATAACCG  
GGTATCCCGGAAAGTTTGGCGCA  
ATCTGTATATACACGACCAAGGTGGGGGTATATACCCCTACCTTCAAGCTTCC  
GGAAGCGTGAAGGTAGGTTATATACCCCAACCTTGTGGTGTGTATATACAGAT  
ATGAAATTTAGCCCGCACACGACCTGATTACAGACTATAGTTTCGGTGTAAACGGAAATGTCAATGGATGCGTTTATAACAGCTCCTGATGTATGCGGTTTGGCGTATCTGTATCTGTA  
TATACGACCCACAAGGTGGGGGTA  
CAACTTTTCTAAGGCTACGGGAACGGGGACCTTGGAAAGCTTAAGTATTTCCCTCTCTGAATTATAATAGTCAAAATAAATATATAGAAGGATTACCTAACCAGCATGGGAAGGAAGCGTGA  
AGGTAGGTTATATACCCCAACCTTGTGG  
TTGATATACAGCAATCTTCTGTTCAACTGAAGTATGCGAGCTGCAGACGGAGCTGGTTATTTAAATCGGCGCAGGCCTCTTTTGCAGCAGTAAG  
CTTACTGCTGCAAAAGAGCCTGCGCGATTAAATAACAGCTCCGCTCTGCAGCTCGCATAGCTTCAGTTGACAGAGAAGATTCTGATATACAA  
CTGAGTTTAGAGAAGTACTATCTGTTTACGGCGGATAAACTGCGCTAAATAGTGTGATGTTGCCATGTGCGGTACGGTCTCTCTAGGTTCTTAAAAATGAATCTAAACCTCTACGGG  
AACGATATGAAAAATCCGAGAAATTA  
GCATACAAAATGCGACACAGAAATCCGATGTGATGTTGGAGGCGGCAATTGCACAACCTAGCAACGATTCCGCAAGAAATCCCGCCACATTTCCGTTGT  
ACAACGGAATTTGGGGGGGATTCTTCGGAATCGTGTAGTTGTGCAATGGCGGCTCCAACTACATCAGTTCGGTGTGCGCATTTTGTATGTC  
ATATAACCGCAATGGTTGACGTTGAGGTACGATGGGACATCAACCACTCAACAGCAAAATCAAAATGGCGCTTCATGATCTTATACCTGAAGATGCAATGCCAAGCTAAACGTATC  
ACCAACTGAAATACATGGGAG  
CTCGCATGTAATTTTCAAGTTGGGTATAGCTTTAGCTTGGCAATGCATCTTCAGTATAAGATACATGAAGCGCCATTGATTGTGCTGTAGAGTGGTTGTATGTCCCCATCGATCCTACATG  
TCAACCAATCGGTTATAT  
TCATATGTGGAATTACCACTCGCATGTATGTTTTCAGTTGGTGATACGTTTACGTTTGGCAATGCATCTTCAGTATAAGATACATGAAGCGCCATTGATTGTGCTGTAGAGTGGTTGTATGT  
GG  
GCATACAAACCACTCTAACAGCAAAATCAAAATGGCGCTTCATGTATCTTATACCTGAAGATGCATTTGCCAAGCTAAACGTATCACCAACTGAAAAATACATGCGAGTGGTAATTCCACA  
TATGA  
TACAAAACACAAGGAGGGGGTACCAATTATTTTCATCAGATCCCGTGGGTGTGGTTTCTTTTATTAAGGCCAGGTATCCCTCAGCTGGCGCATACCC  
ATGCCATCTGTCGCTTTAAACAAAGTTTGAAGAAAATGACAGTCTGTGGGGTGGATTACCCCTTAGAAGGCCTTCTTTAGGTGCTTGTGGTGGAA  
TCCCAACACAAGCACTAAAGCCCTTCAAGGGGTAAATCCCAACCAAGCTGCATTTTCTCAAACCTTGTAAAGCGGAACGATGGCAT  
CCCCACAAGCTGCATTTTCTTCAAACCTTGTAAAGCGGAACGATGGCATGATTTCGCACGCTTTTTCGAAGAGAGCATACGTGAAATTTCTTTTGTATAGACGCTTCTCGCTCTCTAA

CGGACCTTATCGGGG  
CCCCGATAAGGTCCGTTAGAGAGCGAAGACGTCTATGCAAAAAGAAAATTCACGTATGCTCTCTTGCGAAAAAGCGTGCGAAATCATGCCATCGTTCCGCTTTAACAAAGTTTGAA  
GAAAATGCAGCTTGTGGG  
CATAACAGAGCTTATGCAGAACACGCGTCGCCACTCGTCGTTTCGGGCAAGACCACCGCGGTCTTATTCCGCTGGTTGATGTCCCAAGGCCACGATCCCGGAGAAAG  
CCTTTCTCCGGATCGTGGCCTTGGGACATCAACCAGCGGAATAAGAACC GCCGTGGTCTTGCCGAACGACGAGTGGCGACGCGTTGTTCTGCATAAGCTCTGTATG  
AAAGGGGCGGTGTAAAGCTGCTTTCGAAAAGCTCTGCTAATATGGCATATCGACCATCGTAAATAGCTTTCATTAAACAGAACTGAGCATGGACC  
GGTCCATGCTCAGTTTCTGTTAATGAAAGCTATTTACGATGGTCGATATGCCATATTAGCAGAGCTTTTCGAAAGCAGCTTTACAACCGCCCCCTTT  
TCGGGAAATCGAGAAACCACCTATCCGACCAAGTTCGCGGTATAATTGTCAGTGGCGGGGCCATGGTTCAATTAGCCATATACGCCACGGTTGTGC  
GCACAACCGTGGCGTATATGGCTAATTGAACCATGGCCCCGCCACTGACAATTATACCGGAACTTGGTCGGATAGGGTGGTTTCTCGATTTCCTCGA  
GCACAACCGTGGCGTATATGGCTAATTGAACCATGGCCCCGCCACTGACAATTATACCGGAACTTGGTCGGATAGGGTGGTTTCTCGATTTCCTCGA  
TCGGGAAATCGAGAAACCACCTATCCGACCAAGTTCGCGGTATAATTGTCAGTGGCGGGGCCATGGTTCAATTAGCCATATACGCCACGGTTGTGC  
CCCATTCACACTCATCACAGTCTATCGGAGAGGGTTTTGTATACCCAACACCTTTTATAACACCGGGTTGTGCCATTTAATACATGACTGTGTTATTGCTCCCATGGCCGTTGCCTT  
CGCGCTCAGAAATGTAACCTGCCGTCGCCGA  
CCACTTGAAGAGGACTGAAAATACGTGTACGTAATGTCAGGGGGGAGTACTGCCCCCTCGTGATTTTCATCAAAAGCAAGGTGGGCCGCTCCTCGGGCGACGGCAGTTACATTTCTGACGCGC  
AAGGCAACGGCATGGGAGCAATAACAC  
CGTGCAATTCCTGCCATGTAGCAGGACGTAGTCCGCCGAAGATGGGTAGGGGTTCGGTGGGATTTAAGCGACCCCCGATGCTGTTATACGACGCAACGATT  
GAATCGTTGCGTCGTATAACAGCATCGGGGGTTCGCTTAAATCCCACCGAACCCCTACCCATCTTCGGCGGACTACGTCTGCTACATCGGCAGGAATTGCACG  
ACTCACACACAGAGGCTTGCCCTCGTGCAATTCCTGCCGATGTAGCAGGACGTAGTCCGCCGAAGATGGGTAGGGGTTCGGTGGGATTTAAGCGACCCCCGATGCTGTTATACGAC  
GCAACGATTG  
CGAATCGTTGCGTCGTATAACAGCATCGGGGGTTCGCTTAAATCCCACCGAACCCCTACCCATCTTCGGCGGACTACGTCTGCTACATCGGCAGGAATTGCACG  
TGTGTGAGT  
CTTTCAATATTCACGAATGTGTGAAACTGTGGTCTTCTTGGGCTGTAGGGTGGGAGAGTGGTTCGCTGACGTGTTAAGTGGGCTTACCCAGAGTCTTCTGTCAAGTTGCAT  
GTTAACGTGCAGTTAT

ATAACGTCGACGTTAACTGCAACTTGACAGAAGACTCTGGTGAAGCCGCACTTACCACGTACAGCCGACCCACTCTCCCAACCCTAACAGCCCAAGGAAGACCAACAGTTTCCA  
ACATTCTGGGAATTATTGAAAG  
AACCATTGGTGTTATAAAGCGGTGAATTATCACTGGATTTACACACTTTTGGCTCTCTTCGGGGTGCTGGTTAACCATAACGCTAAGCAAGTCCTTTGTG  
GACAAAGGACTTGCTTAGCGTTATGGTTAAACCAGCACCCCGAAGAGGAGCGCAAAAAGTGTGTAAATCCAGTGATAATTCACCGCTTTATAACACCAATGTT  
AAGACAATTTTATAAATTCATTCCTTTTAAATATAGGTTATATGTTACACAAATATCATATCCCGCGTCTCTTCGGCGTTTGGGA  
TCCAAAACGCCAAGAAGACGCGGGATATGATATTTGTGTACCATATAACCTATTTTAAAAAGGAATGAATTTATAAAAATGTCTT  
GCTTGATTAAATTTAAACCTCATGCAACCGTAATACGAATAACGGCTCCGGTTAACAAACGGTCTAATTCGGCGTTATTCCTTGGGGGATTACTATTCCAAGCCGCTTCGGCAGCCTTTTGTG  
CTCGCATGGCGCTACGGCGCGGACCG  
CAAGCTCGTGGTGGCTCTACGCCATCATATAACAAACGGCTCTTTGTGAAGCGGTCCGGCGGTAGCCGCATGCAGGCACAAAAGGCTGCCAAGCGGCTTGGAAATAGTAATCCCCCA  
AGGAATAACGCCGAATTAGACCGTTTCT  
ATGCAACACAGAGGGTTGACCGGAACGGGATAAAAAAAGTACCCGTGCAATGGTTTACGTACGCTGATATGCCATCATAATAAGGCCATGGTAAAGCGCTCCGTCATATATCTCATA  
TTTCTCGTTGTGGCGTGGCGCTCCGC  
ACTTCGATCGTATCTCATATACACGCCGAATTAACCTCTCGGTGGAATGTCGGTTTCTTCGGGGGTTCTCGGGGAACCTCTGG  
CCAGAAGTTCGCCAGGAACCCCGGAAGAAACCGACATTCCACCCGAAGGTTAATTTCGGCGTGTATATGAGATACGATCCGAAGT  
CTATAAATCGTTTATGATCGAAAGTTGTAAATACTCTATAGCCCGAATCAATAAACCTTCGCTTGGTAATGTAATGAAGACACCTTCTTTAA  
ACCAACACCGTTCGACTGGACCTAGATGTATGTTACAGCGAGGTTGATCCTTGGCATGCGGTTCTAGAAACAACCTCGACTGGGTCTGG  
CCAGACCCAGTCGAGTGTGTTTCTAGAACCCTGCAAGGATCAACCTCGCTGTAACCTACATCTAGGGTCCAGTGCAACCGGTGTTGGT  
CGACGAATAGAAACCGGTGAGGTTACGTGGACGATGCATGGACAACATTTAAAGAGAAACCGGGGATATGTTGGCATCGGGGACACGTACGCTACTTCCGTAGATAGTATAA  
AGG  
TGGATTTAATTAAACAGCATGAGTATATGGCCCTACCTCTAGACCCGTAATCGAGGCGCATTTAGAGTCTGTTACTCGTTCGCTCATTGGATGGAGACCCGAAAGGCAATGCC  
GG  
CCCGGCATTGCTTTTCGGTCTCCATCCAATGAGCGAACGAGTAACGACCTCTAAATGCGGCCCTCGATTACGGGTCTGAGGGTACGGGCCATATACTCATGCTGTTAATTAAAT  
CCA  
TGTTGATGAACCGTAGACTGACTGGATAGAACGTGGCCATCTCGATCTGTTTGGGGATTTCGAGCTAAATGAGGTCCGGCAAACTGGTAAATCGATTAAATGATGGACCCGGTC  
CCCCATCT  
AGGATGGGGACCGGGTCCATCATTTAATCGATTTTACCAGTTTTCGGGACCTCATTTAGCTCGAATCCCCAAACAGATCGAGATGGCCACGTTCTATCCAGTCAGTCTACGGGT  
CATCAAAACA  
TGCTACGAGCGGCCAAAAATGAAATTTCTCCAGATCCTAACTCTAACCCGCGACGCATAAACGTAACCCAGGGGCCCCGTTGGGCACTGTACAGTCTTCTGAGTATTTTCCATTT  
TGG  
CCAAAAATGGAATACTCAGAAGACTGTGACAGTGGCCACGGGGCCCCGTTGGTTACGTTTATGCGTGCCGGGTGAAGATTGGATCTGGAGGAAATTTCAATTTTGGCCGCTCGTA  
GCA  
CATGTGTATTTACGACAGCAAGTTGAGGGGCGGAACCTTCGTAACCAATTCCAACCTGTTTTCGGCGCGCTTTTGTGACCTGTTAATGGGGGTTTATATCAACACGCTCTATAACCG  
TAACATATCTGAAGGTCCTGATCCG  
CTTCCAGCTTACCGCGCTTAATCCCATCAAAGGTACGCCCGCGGGCGCTTGTGCCAATGTCGGATTGGGGCGGATACAGGACCTTCAGATAATGTTACGGTTATAGACGCTGTTG  
ATATAAACCCCCATTAAACAGGTCAAC  
ACATTATCTGAAGGTCTGTTATTCGCCCCAAATCCGACATTTGGGACAAGACGCGCCCGGGGGCTACCTTTGATGGGATTAGCGCGCTGAAGCGTGAAGTTATTCGGGATAT  
ACGAGTTAAAAATAGG  
CCCTATTTTAACTCGTATATCCCGAATAACTTCCACGCTTACGCGCGCTAAATCCCCATCAAAGGTACGCCCCGCGGGCGCTTGTCCCAATGTCGGATTGGGGCGGATACAGG  
ACCTTCAGATAATGT  
ATTAAGCCAGTGTCTATGTGTTATTTACGGACAGCAAGTTGAGGGGCGGAACCTTCGTAACCAATTCCAACCTGTTTTG  
CAAAACAGGTTGGAATGGTTACGAAAGTTCCGCCCTCACTTGTGTCCTGTAATAACACATACACATGACACTGGCTTAAT  
CTCAACATATACAGAGGTTTACGAGGTTACCTCTATGATATAAACAGCCAAACGAACTTATACAGGAATACATACAGACACAACGGAATAACACGCGATATCGGAGTATATTACCAACGATAGAA  
AAGGCTTAAAGTTCCAGACCG  
CGGTCTGGAACCTTAAAGGCTTTCTATCGTTGGTAATATACCTCGATACTGCGGTGTAATTCGGTGTGCTGTATGTATTGCTGTAAAAATGTACGATAGAGCAATTTTGGCTGTCAAA  
CCTCGTGTATATGTTAG  
TGTTATGTCTAATGATACGTGGTAATCAATAACAAACCGTTACCTTTACCGCAGGAGGCTGATTAAATGGCGGAGGACCTTAAACAAATTAATCCATGTAATTTGT  
ACAAATTACATGGAATTAATTTGTTAAGGTCTCCGCAATTAATCGAGCCTCTGCGGTAAAGTGAACGGTTTGTATTGATTACCAGTATCATTAGCAATAACA  
ATCCCCGGGCTCGTATCAAAACGATGACGACCACTTTGGTTAGGTGTATCGTTTGCAAAAGTTGGCTGCTCGTAACGCTCCGCGGAAACAACCGAATCTCAAAATTAGACAATTCG  
TCAAAACCGGGTGGATTGAGG  
CCCTCAAAATCCACCGGTTTACGCAATGTCTAATTTGAGGATTCCGTTGTTTCCGCGGAGGCGTTACGAGCAGCCAACCTTGCAAACGATACACCTAACCAAGTGGTCGTACTG  
GTTTGATACGAGCCCGGTT  
TGAAGAAAACGACTGGAAGTTATAAACATACCTTGAGAAAAACCAATGGTCAGTAATACGTTCTGTTTGGCTGTTTATCTAATAGTCACCCACTCTTAAATATAAAAAACAGCGTTTGA  
TCAAACCGCTTTTATATTTTAAAGTGGGTGACTATTAGATAAACAGCCAAACGAAACGATTAACGACATTGGTTTCTCAAGTATGTTATAAATCCAGTCGTTTCTTCA  
CATTGAAACAGAGTGCATCGAGGTTGTCACGCGGTGCTATAGTCAAAATCAACTAATGTGTGTCAGAGGGGATGAATCGTTGCGGTACAAATACGTAACAGTCCTACTTAAATATCCGTC  
GATCCAAACAAAAGTACAATGGAGATCG  
CCATGTACTTTTGTGGATCGACGGATTATAATAGTGACGTTTACGTATTGTACCCGCAACGATTATCCCTCTGAACAACTATAGTTGAATTTGACTATAGACACGCGCGTGGACAACC  
TCGATGCATCTGTTCATGAGATCG  
CAACTGGCGCTGCGCCGCTCTCGACTAGAAACATCATAACCGGTGTAGCCGGGACAATTTTCTGACATGCCAACGCTGTGAAAAATACCCGACAGACATCAGTCCATGTATAACCATC  
ATTTATTCGGGAATAAGAGTTGCGATT  
GACAACAGAAATCGTAACCTGCTCAAAATCGCAACTCTTATTCGGGAATAAATGATGGTTATACATGGAGTATGTCTGCGGTTATTTTACAGCGTGGCATGTGAGAAAAATGTGCC  
GGCTACCGGTTATGATGTTCTAGGT  
TCTGGGTAGAAAGCGCTACTTTTGACAGAGACTTGCTGGAATAATATTAGGAGCTGTGTTTGAACACACACTATTCACCTCTGTTTCCATTGTGGGAGGTGCGGTTATGTC  
CGGTGACCGTCTAGG  
CCTAGACGGTCAACGCGACATAACCCGACCTCCCCACAATGGAACAGAGGTGAATAGTGTGGTTGCAACACAAAGCTCCCTAATATATTTCCAGGCAAGTCTCTGTGCAAAAGT  
AACGCTTCTACCCAGA  
CGCTAACGTTAAATTTGAGACGGTTAAACGTTTGAATCCATCCGATTATGCCACCTTTACAGTTGGAGGAAAACGCTTTTTTTTTGTGCGCTCAACGTTCCAGAAAGTCTGCTGGGT  
GTT  
AACACCCAGCAGACTTTCTCGAACGTTAGAGCGCACAAAAAAGACGTTTTCTCCAACTGTAAAGGTGGCATAATCGGATGGATTCAAACGTTTAAACGCTCTCAAAATTAACG  
TTACCG  
CGACACCGTCTCGGCTGCTCGCGCGGAGGCGTCTGTGTTTCCATTGCTGAATGGAATAGACGGCCATGCGCTCTGGATGGCGGGTTTGGACGCATAATTGACATGCACATCGCCAGA  
TTACATACCCAAATGGATTAATAAG  
ATAATATCTGTTAAGTGACCAAGCGGCTTATGATAGCGGATGGTGACGACTAAGCTCGGCCCTATAACAACTTATTAATATCCAATTTGGGTGATGTAATCTGCGCATGTGCATC  
TGCAATATGCGTCCAAACCGCGATC  
CGACACCGTCTCGGCTGCTCGCGCGGAGGCGTCTGTGTTTCCATTGCTGAATGGAATAGACGGCCATGCGCTCTGGATGGCGGGTTTGGACGCATAA  
TTATGCGTCCAAACCCGGGCTCCGAGCGGATGGCCGCTATTCATTTCAGCAATGGAACACACGACGCGCTCCGCGCGAGCAGCGGACCGGTGTCG  
ATCGGTGGACACTCAACACCGGTTTGGCAACCAATCTTTAACGGGGGGCAATGTCGGAAACAAACGTTCAAAAGTCGTTTAAACGATCGGTGTCACAGT  
ATCAACGGCATGCTCGAGG  
CCCTCGAGCATGCGGTGATACCTGTGACCACCGATGTTTAAACGCACTTTGAACGTTTGTGTTCGGGACATTGCCCCCGGTTAAAGGATGGTTGGCCTTGCCAAACCCCGGTTG  
TGATGTGTCACCGAT  
CGCGCGGGGCCCCGCGACGATATCCCGCGCTTACGGGTCTGGTGACAGATCCATATTCCTCTTCCGTTAATCATCAACCGATGCCCGGGTTTTG  
CAAAACCCGGGATCGGTTGATGTTAACGGAAGATGGAATATGGATCTGCACAGGACCCCTGAACGGCGCGGATACGTCGGGGGCCCCGGCGCGG  
ATCGGTTGATGTTTAAACGGAAGATGGAATATGGATCTGCACAGGACCCCTGAACGGCGGGATACGTCGGGGGCCCCGGCGGTTTTGTACTCCGGGTGGG  
CCCAACCCGAGTACAAACCGCGCGGGCCCCGCGACGTATCCCGCGGTTACGGGTCTGTTGTCAGATCCATATTCATCTTTCGTTAACATCAACCGAT  
AGTACAAATTCCTCCGTTGGAACGCGCCGACGGGGGCTGGTGAGATACCACTAGCGTTACCTGTACAGAAGCCATATCGCTGCTGTTCTACAACTCGGTAACCTTTAAATGCGG  
AACAGCTTTTCACAATCTTCATTGATT  
CTGAGGTTGATACCGGGGGTCCGCATAGTCCACGCTCATATACCGATGACACGCGGTTCCGTTATAATCAAACTCACATCCGATAGCGG  
CCGCTATCCGATGTGAGTTTGATTATAACGGAACCGTGCGGTGTCATCGGATATGAGGCGTGGGACTATGCGGCACCCCGGTATCAAACCTCAG  
GGCCAGGCTCGTTGAGGACATCAACCGTGTTTTTATGATTTGCACAGTCTGCGGACGCGTCACGCGAGATTACGAAAGATTGCGGCGCATATGCCTCGACTTTTAT  
ATAAAAGTCGAGGATATGCGCGCAATCTTCGTAATCTCGGTGACGCTCCCGACGACTGTGCAATACATAAAAAAACAGCGTTGATGTCTCAACGAGCCTGGCC  
ATAGTATCAGAAATTAATTTGGCGCAATTATATACACGTGTTAATAGGACCGTCCCTGGGAACGCTCTGCGGCTGTGCTACGTTGGGAACCGCGCGCATCTGATATGGACCGATTAT  
ATAATCGGTCATATACGAGTGGCGCGGTTCCCAACGTAGCACAGGCCACGAGCTTCCACGGGACGCTCTATTAAACAGTGTATATAATGCGCCAAAAATTAATCTGATACT  
AT  
GTCCGGGATCCAAACACGTAGCAGAACTGCCATGCGTTCTAAATTTGTGAGTTGTGGCGAGTACATTTTATAATTGGTACCAACGAAGACACACCCCTATATCCCTCCACCCATTT  
CTTTAAGTCCC  
GGGACTTAAAGAAATGGGTGGAGGGATAGGGGTGTGCTTCGTTGGTACCAATTATAAAAAATGTACTGCCCAACCTACAATTTAGAAGCATGGCAGTTCTGCTACGTGTTT  
GGATGCCCGGAC  
CTCCACCCATTTCTTTAAGTCCCACCCCACTAAAAAGCTGGGTATAAAATGTGTATTGGGTAGGCGGACAGTCCCAACAAACAGGGAAGTTGAT  
ATCAACTTCCCTGTTTGGGACTGTCGGCTACCCCAATACACATTTTATACCACTTTTATGTTGGGTGGGACTTAAAGAAATGGGTGGAG  
GTGTGCTTCTGTTGGTACCAATTATAAAATGTACTGCCCAACCTACAATTTAGAACGATGGCAGTTCTGCTACGTGTTGGATGCCCGGACATTAGAATACAGCCAGTTGTTAC  
CATGGAT  
ATCCATGGTAACAACCTGGCTGTATTCTAATGTCCGGCATCCAAACACGTAGCAGAACTGCCATGCGTTCTAAATTTGTGAGTTGTGGCGAGTACATTTTATAATTGGTACCAACGA  
AGACACAC  
CACACGTTGTAGGCTGCGCTTCTTAAACAGGCTTATGAGATGGGAAAAAGGGCACCCACAAACATACGATATACATTATGTATAT  
ATATACATAATGTATACGTATGTTTGGGTGCGCTTTTCCCATCTCAATACTGTTTAAAGAAGCGAGCCTAACACGTGTG  
ATATAATATATATAACCTATGTATAATATGTTTACATCTCGCATCTTATGTTATATATATTATAT  
ATATAATATATATAACATAAGATGCAGGATGTAACAAATATATATACATAGGTTATATATATATAT  
ATTTTATATATATGATACATGTATAATTATATATACATAATGTATACGTATAATTGTGGGTGCCCTTTTTCACATATCATACTGTT  
AACAAGTTATGATATGTGAAAAAGGGCACCCACAAATATACGTATACATTATGATATAATAATATACAGTATCATATATATAAAAT  
CTTAAAAAAGTTATGAGTTGGGAAAAAGGGCACCCACAAACATACGTATAC  
GTATACGTATGTTTGGGTGCCCTTTTCCCACTCATACTGTGTTTAAAG  
TATTATTATATACATAATGTATACGTATGTTTGGGTGCCCTTTTCCCAT

ATGGGAAAAAGGGCACCCACAACATACGTATACATTATGTATATAATAATA  
CTATATGCTTACTGTATAATTATAAACTTATATAATTCAATTATTATTTTTACAATAAGACATATAG  
CTATATGCTTATTGTATAAAATATAATAATTGATAATATATAAGTTTTATAATTATACAGTAAGACATATAG  
TCCCAAGCCCAACACGTTATTAGGCTGCGCTTCTTAAACAAGTTA  
TAACTTGTTTTAAGAAGCGCAGCCTAATAACGTGTGGGCTTGGGA  
TATATAATATATATAACCTATGTATAACATTGTTTTACATCCTGCATCTTATGTTATATATATTGTATAAAATATAATAATTGATAA  
TTATCAATTATTATATTTTATACAATATATATAACATAAGATGCAGGATGTAAAACAATGTTATACATAGGTTATATATATTATATA  
CCAAGCCCAACACGTTATTAGGCTGCGCTTCTTAAAA  
TTTTAAGAAGCGCAGCCTAATAACGTGTGGGCTTGG  
ATTTTATACAATATATATAACATAAGATGCAGGATGTAAAACAATATTATACATAGGTTATATATATTGTATAAAAT  
ATTTTATACAATATATATAACCTATGTATAAATATTGTTTTACATCCTGCATCTTATGTTATATATATTGTATAAAAT  
GTCATATTGTATAAAATATAAACTTATATATTATCAATTATTATTTTAGACAATATATATAATATAAGATGCAGGATGTAAAACAATATTATACATTGGTTATACA  
TGTATAACCAATGTATAAATTGATTACATCCTGCATCTTATATTATATATATTGCTAAAATATAATAATTGATAATATATAAGTTTTATATTATACAAAATGAC  
TACTATATGCTTATTGTATAATTATAAACTTATATATTATCAATTATTATATTTTAT  
ATAAAATATAATAATTGATAATATATAAGTTTTATAATTATACAATAAGACATATAGTA  
ATCAATTATTATATTTTATACAATATATATAACATAGGATGCAGGATGTAAAACAATATTATACAT  
ATGTATAATATTGTTTACATCCTGCATCCTATGTTATATATATTGTATAAAATATAATAATTGAT  
ATATTTTATACAATATATATAACATAAGATGCAGGATGTAAAACAATATTATGTTATATATATTGTATAAAATAT  
ATATTTTATACAATATATATAACATAATATTGTTTACATCCTGCATCTTATGTTATATATATTGTATAAAATAT

CATATTGTATAATTATAAACTTAATATTATCAATTATTATATTTTATACAATATATATAACATAGGAAGCAGGATGTAAAACAATATTATACATAGGTTAT  
ATAACCTATGTATAATATTGTTTACATCCGCTTCCTATGTTATATATATTGTATAAAATATAATAATTGATAAATTTAAGTTTTATAATTATACAATATG  
CAGGATGTAAAACAATATTATACATAGGTTATATATTATATATATGATACTGTATATTATTATATACATAATGTATACGTATGTTTGTGGTGCCCTTTTTCCATCTCATAACTTGTT  
TT  
AAAAACAAGTTATGAGATGGAAAAAGGGCACCCACAACATACGTATACATTATGTATATAATAATATACAGTATCATATATATAAATATATAACCTATGTATAAATTGTTTTACA  
TCCTG  
GTTTTACATCTCGCATCTTATGTTATATATTGTATAAAATATAAATTATTGATAATATATAAGTTTTATAAATTATGCTACATGAC  
GTCATGTAGCATAAATTATAAACTTATATATTATCAATAATTATATTTTATACAATATATATAACATAAGATGCAGGATGTAAAAC  
CAGGTGGGCATGTGACTGAGGCTGGCCAGTGAGAGTATACCATCTCAAAATTCAGGTGGCAGCTCACCCCGCAAGACAACAGAAAGTCCCTGGAGACCTGATTGAGTTGTCAGGGAGA  
GAGACAGAGAGTTTGAACAAATAGTGAGCC  
ACATGCGCTTCCTCTATGTGGGCTTCATCTTAAACAGGCTTCCCCAACGAGATAGTCCACAGAAACCCGAGAACAACTGGGCTCACTATTGTTCAAACCTCTGTCTCTCTCCCTGAACA  
ACTGAATCAGGCTCCAGGGACTTCTGTTGT  
AGAACCACAGGAGATCCAGAACAGTTGCCAGATACAAGTCACTACACAAACCAAGTGATCTTCTACCGGCAACCCACCAGAAAGTGTGACTGCTTGTAGATGGTAACCAAGAAAAACC  
ATAAAGTGTAGGAATTAATCTAAGAAG  
GTGGGGAAGAGACATCATTATAACAACAGATCACTCCCTCCATGAGCACGGGATCTTCTTCAATCATCAGACCCACGCTTCATCCAGGATTAAGTCTGATGGTCTCTTTCTGGAG  
GTCTTCTTAGATTAATTCTAAACACTTTATG  
CAGACCCACGCTTCATCCAGGATTAAGTCTGATGGTCTTCTTCTGAGGCTCTTCTAGATTAATTCTAAACACTTTATGGGTTTTCTGGTTACCATCTCAAGAGCAGTCACACTTTCT  
GG  
CCAGAAAGTGTGACTGCTTGTAGATGGTAACCAAGAAAAACCATAAAGTGTAGGAATTAATCTAAGAAGACCTCCAGAAAGAAGACCATCAGACTTAATCCTGGATGAAGGCGT  
GGGCTG  
CCGTAAACATATTTAACGCATCCCGTGACCCCTGTAAACGCACACAGCGTCACAGCGTTCTAGATAAAAAAGCAGTCGCGCAACAGGGGTGCTCCAAATCCACAAATGAGTGCCAAATAAT  
CCACGCTAAACTCTGTGTTTATGAAC  
TTAAAGTCCACATTCATACGTTCCGATCTTGGTGATCCCAAGGAGACTTGGAGATTGGTATTGAGCATGTCAAATAAAAAAAGTGTAGCTTCGCGTTAAATGATCAGGAGTA  
CGGATATCAGCGGATCTATAAACAT  
GTTTATAGATCCGGCTGATATCCGTACTCTGTATCATTTAAACGCCAGAAGTACAACATAAGTTTTTAATTTTACATGTCTCAATACCAATCTCAAGTCTCCTGTGGGTACACCAAG  
AATCGAACGTATGAATGTGGACTTTAAAG  
CCGTAAATTAACGAAGAAGCGTCGTCTGATGTGAAAAAGGCGGTGTGGTGAAGGACAGTTGGTTTCAAGGCTCGCGCTTTCGATGTATACTGGTGGGGTGTGGTGTGGT  
GTGGTCTGATCGTCA  
TGACGATCAGACCAACCAACCAACCCCGCACCACTATACATCGCAAGGCGGAGCTGAAACCAACTGTCTTCACCCACAACCCGGCTTTTTACATCAGACGACGAGCTTCT  
TTCGTTAATATTACG  
GCAGGGGTTCCTATCTGAATAAAATGTTAGCTGGAATTTTCTGGGTAGATCGTAAAACTTAACCTACCTTAACCTCTGGGATTTCTGTTTTCTGGTGACCATGGTCTTTC  
GAAAGACCATGGTACCCAGAGAAAAACAGAAATCGCCAGAGTTAAGGTAGTTAAGTTTTTACGATCTACCCAGAAAAATCCAGCTAAACATTTTATTCAGATATGGGAACCCCTGC  
GGACAAGTTGTGGAGCTGCCAGAAAAACATACGTCGATTTTTTGAACATGTTTTTATCGCCGTATACTCCGGTATACTGGAGTCTTCAGGAGCAAAATTCGGAACAAAAAGCAATACCGG  
CATCTTATCTGACATACGGACACATGC  
GGGAATACAGGCACACGATGGTAGCAATTCCAGTAAACAACAGTAGGAGGTCCATGTGGGTGGGATTACGAACCAATAATTATCTGCTTGGTTTATAATCCTTATCTGATGTGTCCGTA  
TGTACGATAAAGATGCCGTATGCTTT  
GGACAAGTTGTGGAGGCTGCCAGAAAAACATACGTCGATTTTTTGAACATGTTTTTATCGCCGTATACTCCGGTATACTGGAGTCTTCAGGAGCAAAATTCGGAACAAAAAGCAATACCGG  
CATCTTATCTGACATACGGACACATGC  
GGGAATACAGGCACACGATGGTAGCAACTCCAGTAAACAACAGTAGGAGGTCCATGTGGGTGGGATTACGAACCAATAATTATCTGCTTGGTTTATAATCCTTATCTGATGTGTCCGTA  
TGTACGATAAAGATGCCGTATGCTTT  
CGGCAATTAACGTAGCCAGGAGCATTACCGCACCCAAAGTGAACATCATCACCTGAATTATCCAAATTCGCAATTAAGCGTATCCATTTGATGATCTAACGCTTCCACCTCGGGTGTCTGGT  
GTCGTACGGTGAGACTTTTTCAGAACG  
TGGAACTCAAAGAAGGGCGCGTTCTGAAAAAGTCTCACCGTACGACACCACGACACCCGAGGTGGAAGCGTTAGATCATCAAATGGATACGCTTAATTGGCGAATTGGATAATTCAG  
GTGATGATGTTCACTTTGGGTGCGGTAAT  
TGGAACTCAAAGAAGGGCGCGTTCTGAAAAAGTCTCACCGTACGACACCACGACACCCGAGGTGGAAGCGTTAGATCATCAAATGGATACGCTTAATTGGCGAATTGGATAATTCAG  
GTGATGATGTTCACTTTGGGTGCGGTAAT  
CGGCAATTAACGTAGCCAGGAGCATTACCGCACCCAAAGTGAACATCATCACCTGAATTATCCAAATTCGCAATTAAGCGTATCCATTTGATGATCTAACGCTTCCACCTCGGGTGTCTGGT  
GTCGTACGGTGAGACTTTTTCAGAACG  
GTGGATGTTCAAAGGGCTGTACGCATATCAATGTCGTTTGAAGTAAATTTGGGACGCCACGCCCCGATTGTGTTGTATTATACAAAC  
GTTTGTATAATACAAACACAATCGGGGCTGCGGCTCCAAATTTACTTCAAACGACATTTGATGCGTACAGCCCTTTGAACATCCAC  
CGGAGCGGTTCAACCCGAGGCTGGCAAACTCCTGTCGCGTTATCCACAGTGGATGTTCAAAGGGCTGTACGCATATCAATGTCGTTTGAAGTAAATTTGGGACGCCGACG  
CGTCCGGTCCCAAATTTACTTCAAACGACATTGATATGCGTACAGCCCTTTGAACATCCACGTGGGATAACGGCGACAGGAGTTTTGCCAGCTCGGGTTGAACGCTCCG  
GCAGCGGCTGGTCCGGATTCAACGAGCCCGCGTTTTATAACCTCCGTTACGGGGGTGTGGTTATGCTTTTTATGCATATTTTCTATGTTTGTACGGCGGTGTGTCTCTCCAA  
G  
CTTGGAGAGACCGACACAACCGCGTAACAAACATAGAAAATATGCATAAAAAGCATAAACCACACCCCGTAACGGAGGTTATGAAAACGCCGGTCCGTTGAATCCGGAGCCAG  
CCGCTG  
GTCAGTCTACGGGTTATCAAAACACAGAGTTTAGCGTGGATTATTGGCACTCATTTGTGGATTGGAGACCCCTGTGGCGGACTGCTTTTTATCTAGAACGCTGTGACGCTGGTGGCTTTA  
CAGGGGTACGGGGATCGTTAAA  
GGGAGGTTGCGGTTATGTCGCGTTGACCGTAAAGAGGAATTGGCAAGTTTATGGGCGGTGCTGTTGTTTCCAAGTGGCTTCTCAGTCCATTTAGGGGCTTTTATGCTTTTCTGGGTAGAAGG  
CGTACTTTTGACACAGAGACTTGCT  
ACGGACATAACCGCACCTCCCCACAATGGAAACAGAGGTGAATAGTGTGGTTCGAAACACAAGTCCCTAATATATTTCCAGGCAAGTCTCTGTGCAAAAGTAACGCCTTCTACCCAGAA  
AAGCAATAAAAGCCCTAAATGGACTGA  
ACGGACATAACCGCACCTCCCCACAATGGAAACAGAGGTGAATAGTGTGGTTCGAAACACAAGTCCCTAATATATTTCCAGGCAAGTCTCTGTGCAAAAGTAACGCCTTCTACCCAGAA  
AAGCAATAAAAGCCCTAAATGGACTGA  
GGGAGGTTGCGGTTATGTCGCGTTGACCGTAAAGAGGAATTGGCAAGTTTATGGGCGGTGCTGTTGTTTCCAAGTGGCTTCTCAGTCCATTTAGGGGCTTTTATGCTTTTCTGGGTAGAAGG  
CGTACTTTTGACACAGAGACTTGCT

## Supplemental Table of Normal Values

| <b>Blood</b>               |                                      |                          |
|----------------------------|--------------------------------------|--------------------------|
| <b>1</b>                   | <b>White Blood Cell Count</b>        | 5-14,000/ uL             |
| <b>2</b>                   | Lymphocytes                          | 20-40%                   |
| <b>3</b>                   | Neutrophils                          | 40-60%                   |
| <b>4</b>                   | Eosinophils                          | 1-4%                     |
| <b>5</b>                   | Hemoglobin                           | 11-15 g/dL               |
| <b>6</b>                   | Erythrocyte Sedimentation Rate (ESR) | <15 mm/hr                |
| <b>7</b>                   | C-Reactive Protein (CRP)             | <1.0 mg/mL               |
| <b>8</b>                   | Aspartate Aminotransferase (AST)     | 15-40 units/L            |
| <b>9</b>                   | Alanine Aminotransferase (ALT)       | 10-25 units/L            |
| <b>Cerebrospinal Fluid</b> |                                      |                          |
| <b>10</b>                  | Protein                              | 16-31 mg/dL              |
| <b>11</b>                  | Glucose                              | 50-80 mg/dL              |
| <b>12</b>                  | Cell Count                           | <8 cells/mm <sup>3</sup> |
| <b>13</b>                  | IL-1RA                               | <10.8 pg/mL              |
| <b>14</b>                  | IL-6                                 | <2.0 pg/mL               |
| <b>15</b>                  | IL-8                                 | <6.0 pg/mL               |
| <b>16</b>                  | IL-10                                | <2.0 pg/mL               |
| <b>17</b>                  | IL-17F                               | <2.0 pg/mL               |
| <b>18</b>                  | IFNg                                 | <6.8 pg/mL               |
| <b>19</b>                  | CXCL10                               | <67.8 pg/mL              |
| <b>20</b>                  | CCL2                                 | <73.3 pg/mL              |
| <b>21</b>                  | GCSF                                 | <17.3 pg/mL              |
| <b>22</b>                  | CXCL9                                | <3.0 pg/mL               |

Note: Normal values taken from the Nelson Textbook of Pediatrics, 20<sup>th</sup> Edition. Editors: R.M. Kliegman, J.W. St.Geme, N.F. Schor: ELSEVER, 2015; and the Human Immunology and Immunotherapy Programs at the Washington University Immunomonitoring Laboratory, St. Louis, MO. Normal values for some cytokines in the cerebrospinal fluids of children are not yet established. .
